# Supplementary material for: Potential of Native Rhizobia to Improve Cowpea Growth and Production in Semiarid Regions of Kenya
Source: Frontiers journal article supplement (doi:10.3389/fagro.2020.606293), 2020-12-14
Supplement: Table_1.XLS [file Table_1.XLS]

## Sheet: Field data
Season	site	Cowpea variety	R.inocula	Height (CM)	Leaf No.	Nodule Number	Nodule dry Weight (g)	Shoot dry weight (g)	Yield/Sample (g)	Yield/Ha	100 seed weight (g)	Stover weight (g)
one	Tharaka Nithi	K80	Native	125.7	41	89	0.527	75.8	44.7667	2909.83	10.2	20.8889
one	Tharaka Nithi	K80	Biofix	96.7	20	120	0.654	38.8	23.7	1540.5	9.2	18.0667
one	Tharaka Nithi	K80	Consortiun	76.7	25	26	0.147	24.5	13.6667	888.333	9.2	17.2
one	Tharaka Nithi	K80	Control	71.3	29	33	0.102	27.6	6.8	442	10.1	13.9222
one	Tharaka Nithi	M66	Native	96.3	11	36	0.171	49.3	34.1	2216.5	12.3	16.3667
one	Tharaka Nithi	M66	Biofix	81.6	27	36	0.192	77.2	14.3333	931.667	12.9	19.7
one	Tharaka Nithi	M66	Consortiun	157	45	21	0.094	127	29.7333	1932.67	10.9	9.73333
one	Tharaka Nithi	M66	Control	142.7	23	19	0.068	31.1	12.5667	816.833	10.5	21.0778
one	Tharaka Nithi	KVU	Native	173.3	23	42	0.297	41.8	36.2667	2357.33	12.3	10.5444
one	Tharaka Nithi	KVU	Biofix	151.7	32	49	0.201	46.1	21.6667	1408.33	14	15.0667
one	Tharaka Nithi	KVU	Consortiun	104.7	25	94	0.578	91.1	22.0667	1434.33	11.6	14.8222
one	Tharaka Nithi	KVU	Control	53.7	29	31	0.129	17.3	15.5667	1011.83	10.2	11.4556
one	Tharaka Nithi	K80	Native	101	58	69	0.694	77.4	31.3	2034.5	10.7	10.8111
one	Tharaka Nithi	K80	Biofix	122.3	49	119	0.751	68.7	11.8667	771.333	9.1	32.2556
one	Tharaka Nithi	K80	Consortiun	99	37	47	0.36	32.7	12.7	825.5	11	15.7
one	Tharaka Nithi	K80	Control	56	22	4	0.009	55.7	13.1667	855.833	9.9	12.5111
one	Tharaka Nithi	M66	Native	82.7	21	47	0.368	37.1	27.9667	1817.83	12	15.9333
one	Tharaka Nithi	M66	Biofix	71.7	24	94	0.456	80	13.9667	907.833	11.1	18.5667
one	Tharaka Nithi	M66	Consortiun	114	31	27	0.104	38.6	34.4	2236	12.4	7.92222
one	Tharaka Nithi	M66	Control	62	10	10	0.042	20.4	27.2667	1772.33	12.5	7.92222
one	Tharaka Nithi	KVU	Native	74	26	126	0.765	33.8	14.6667	953.333	13.4	22.0667
one	Tharaka Nithi	KVU	Biofix	85	27	39	0.147	60.1	19.1	1241.5	11.9	12.1889
one	Tharaka Nithi	KVU	Consortiun	134	16	49	0.258	28.3	15.9	1033.5	13	10.9333
one	Tharaka Nithi	KVU	Control	56.7	22	24	0.099	36.2	13.6667	888.333	14.9	19.0667
one	Tharaka Nithi	K80	Native	116.3	42	30	0.126	101.5	44.7667	2909.83	12.4	12.4444
one	Tharaka Nithi	K80	Biofix	87.7	18	104	0.947	37	43.9	2853.5	12.4	9.88889
one	Tharaka Nithi	K80	Consortiun	58.7	10	39	0.414	56.4	25.7333	1672.67	9.7	32.2556
one	Tharaka Nithi	K80	Control	101	23	21	0.095	54.4	8.03333	522.167	9.1	15.3889
one	Tharaka Nithi	M66	Native	83.7	21	39	0.204	30.9	21.5667	1401.83	20.3	22.0556
one	Tharaka Nithi	M66	Biofix	97.7	18	37	0.21	31.3	22	1430	12.8	18.6111
one	Tharaka Nithi	M66	Consortiun	62	21	24	0.098	51.1	19.4	1261	11.2	22.0667
one	Tharaka Nithi	M66	Control	103.7	16	15	0.048	46.5	16.7667	1089.83	9.4	10.6222
one	Tharaka Nithi	KVU	Native	60.3	20	74	0.426	44.3	9.43333	613.167	12.7	13.8556
one	Tharaka Nithi	KVU	Biofix	57.3	17	73	0.239	25.6	22.8333	1484.17	12.5	13.8889
one	Tharaka Nithi	KVU	Consortiun	84.7	17	105	0.647	37.3	17.7333	1152.67	11.9	12.2667
one	Tharaka Nithi	KVU	Control	78.3	16	20	0.057	26.6	24.9667	1622.83	10.2	10.5222
one	Tharaka Nithi	K80	Native	57.7	18	31	0.089	64.9	23.6333	1536.17	12.9	21.9889
one	Tharaka Nithi	K80	Biofix	59	27	94	0.0456	30.1	19.2	1248	12.1	11.1556
one	Tharaka Nithi	K80	Consortiun	64	28	151	0.933	27.5	18.9333	1230.67	12.8	6.84444
one	Tharaka Nithi	K80	Control	67.3	33	20	0.841	19.5	17.4333	1133.17	10.4	18.8
one	Tharaka Nithi	M66	Native	61.3	35	103	0.871	56.5	21	1365	12.3	19.5556
one	Tharaka Nithi	M66	Biofix	68	34	41	0.61	21.5	31.6333	2056.17	14.2	14.1444
one	Tharaka Nithi	M66	Consortiun	50.3	26	179	1.294	33.7	17.7	1150.5	11	18.2222
one	Tharaka Nithi	M66	Control	57.3	39	30	0.491	36.4	15.4333	1003.17	10.2	13.7222
one	Tharaka Nithi	KVU	Native	45.7	20	34	0.141	18.5	19.2	1248	13.3	10.9556
one	Tharaka Nithi	KVU	Biofix	51.3	26	29	0.741	31.1	21.7333	1412.67	14	15.6778
one	Tharaka Nithi	KVU	Consortiun	51	28	96	0.241	74.8	20.8	1352	11.6	5.71111
one	Tharaka Nithi	KVU	Control	59.3	26	31	0.201	51.4	14.1667	920.833	9.8	13.2444
one	Tharaka Nithi	K80	Native	80	32	72	0.537	71.7	27.1	1761.5	13.2	14.4889
one	Tharaka Nithi	K80	Biofix	81.7	41	47	0.538	43.9	9.9	643.5	9.9	14.1556
one	Tharaka Nithi	K80	Consortiun	51	19	89	0.765	31.8	14.1333	918.667	10.9	5.55556
one	Tharaka Nithi	K80	Control	65.3	40	14	0.765	16.1	21.1667	1375.83	10.3	7.63333
one	Tharaka Nithi	M66	Native	61.3	24	33	0.323	54.5	14.0333	912.167	13.2	11.0222
one	Tharaka Nithi	M66	Biofix	122	58	12	0.019	40.6	32.6	2119	12.7	15.0222
one	Tharaka Nithi	M66	Consortiun	54.3	32	28	0.148	26.8	13.5667	881.833	12.2	28.9222
one	Tharaka Nithi	M66	Control	63	41	41	0.149	32.7	27.6	1794	9.1	8.63333
one	Tharaka Nithi	KVU	Native	56.7	25	69	0.349	20.1	29.6	1924	13.4	16.5556
one	Tharaka Nithi	KVU	Biofix	62	20	194	1.274	38.5	24.8667	1616.33	11.9	19.7222
one	Tharaka Nithi	KVU	Consortiun	63.3	38	104	0.921	49.5	25.5	1657.5	13.3	15.2222
one	Tharaka Nithi	KVU	Control	66.7	29	24	0.135	8.9	15.9333	1035.67	13.3	14.9333
one	Tharaka Nithi	K80	Native	97.3	44	200	1.094	24.5	23.3667	1518.83	10.2	7.82222
one	Tharaka Nithi	K80	Biofix	65	40	53	0.522	42	15.7333	1022.67	9.2	11.6444
one	Tharaka Nithi	K80	Consortiun	56.3	20	109	0.974	21.6	17.1	1111.5	10.9	10.1444
one	Tharaka Nithi	K80	Control	53.7	22	24	0.411	31.5	6.8	442	9	8.9
one	Tharaka Nithi	M66	Native	78	35	49	0.841	44.1	26.0667	1694.33	14.4	7.53333
one	Tharaka Nithi	M66	Biofix	59.7	36	49	0.841	44.1	13.7667	894.833	10.6	13.5
one	Tharaka Nithi	M66	Consortiun	58	23	79	0.53	26.8	24.5	1592.5	13.5	11.2333
one	Tharaka Nithi	M66	Control	71	47	17	0.079	33	11.5	747.5	10.9	13.0333
one	Tharaka Nithi	KVU	Native	75	31	41	0.589	23.7	20.9	1358.5	12.7	14.2444
one	Tharaka Nithi	KVU	Biofix	72.3	35	89	0.941	34.2	18.3	1189.5	12.5	17.9222
one	Tharaka Nithi	KVU	Consortiun	85.3	37	73	0.511	48	24.5	1592.5	13	23.2
one	Tharaka Nithi	KVU	Control	58.3	27	21	0.426	14.7	10.9333	710.667	9.2	10.4222
one	Tharaka Nithi	K80	Native	61	32	17	0.225	16.7	16.7333	1087.67	12.3	9.73333
one	Tharaka Nithi	K80	Biofix	63	23	72	0.717	24.2	8.83333	574.167	14	21.0333
one	Tharaka Nithi	K80	Consortiun	71	31	96	0.712	39.6	18.2	1183	12.1	17.4444
one	Tharaka Nithi	K80	Control	59	28	21	0.094	29.7	6.8	442	9.6	8.64444
one	Tharaka Nithi	M66	Native	77.7	39	117	0.53	50.4	15.3333	996.667	9.8	7.92222
one	Tharaka Nithi	M66	Biofix	63.3	20	12	0.049	30.1	13.8667	901.333	9	15.1333
one	Tharaka Nithi	M66	Consortiun	62.3	23	99	0.694	27.7	19.0667	1239.33	11	9.46667
one	Tharaka Nithi	M66	Control	55.7	17	36	0.194	27.5	12.0333	782.167	9.2	15.3333
one	Tharaka Nithi	KVU	Native	72.3	28	76	0.565	10.8	26.6	1729	15	12.3556
one	Tharaka Nithi	KVU	Biofix	84.3	34	68	0.789	11.7	19.3667	1258.83	14.5	15.9778
one	Tharaka Nithi	KVU	Consortiun	59.3	24	8	0.384	28.9	19.7667	1284.83	11.4	13.9
one	Tharaka Nithi	KVU	Control	60.8	18	5	0.029	23.6	18.4	1196	10.2	13.0222
one	Tharaka Nithi	K80	Native	61.7	17	94	0.956	24.2	20.5	1332.5	12.5	18
one	Tharaka Nithi	K80	Biofix	47.7	22	94	0.997	20.3	23.7667	1544.83	13.4	13.8778
one	Tharaka Nithi	K80	Consortiun	52.3	20	56	0.358	26.5	19.0333	1237.17	11	19
one	Tharaka Nithi	K80	Control	27	61	19	0.045	24.1	18.4	1196	10.2	8.61111
one	Tharaka Nithi	M66	Native	52	19	84	0.561	22.6	21.5	1397.5	12.4	11.9111
one	Tharaka Nithi	M66	Biofix	62	30	34	0.155	32.9	12.4333	808.167	12.4	7.83333
one	Tharaka Nithi	M66	Consortiun	53	27	104	0.764	32.9	30.4667	1980.33	12.1	9.81111
one	Tharaka Nithi	M66	Control	46.7	19	24	0.225	23.2	9.7	630.5	10.1	10.2556
one	Tharaka Nithi	KVU	Native	50.3	50	112	0.956	46.8	17.7	1150.5	10.2	8.3
one	Tharaka Nithi	KVU	Biofix	68.7	22	91	0.745	49.6	24.6	1599	11.4	6.82222
one	Tharaka Nithi	KVU	Consortiun	61	16	204	1.453	16.7	30.9	2008.5	10.6	8.86667
one	Tharaka Nithi	KVU	Control	77.7	29	29	0.172	44.3	14.7667	959.833	9.1	7.55556
one	Tharaka Nithi	K80	Native	62.3	46	109	0.575	12.4	19	1235	11.9	6
one	Tharaka Nithi	K80	Biofix	73.3	15	109	1.034	29.2	15.4667	1005.33	11	9.34444
one	Tharaka Nithi	K80	Consortiun	52.3	32	64	0.657	43.6	13.6333	886.167	10.5	6.36667
one	Tharaka Nithi	K80	Control	44.3	14	16	0.639	19.6	12.5667	816.833	9.8	5.46667
one	Tharaka Nithi	M66	Native	57	16	75	0.521	27.5	14.1667	920.833	12.4	10.2111
one	Tharaka Nithi	M66	Biofix	63	16	79	0.291	21.6	12.1333	788.667	12.8	9.52222
one	Tharaka Nithi	M66	Consortiun	64.4	21	184	0.976	29.6	17	1105	10.1	7.1
one	Tharaka Nithi	M66	Control	41.3	20	32	0.108	25.1	10.4	676	9.3	9.47778
one	Tharaka Nithi	KVU	Native	56.3	22	85	0.491	22.7	21.0667	1369.33	12.6	7.93333
one	Tharaka Nithi	KVU	Biofix	75.7	14	61	0.233	28	23.6667	1538.33	11.2	10.8556
one	Tharaka Nithi	KVU	Consortiun	52	16	142	0.951	28.7	18.2	1183	14	8.92222
one	Tharaka Nithi	KVU	Control	53.7	21	40	0.254	15.7	12.2	793	9.9	11.3667
one	Tharaka Nithi	K80	Native	45.3	18	4.8	0.131	20.2	10.0667	654.333	16.3	8.55556
one	Tharaka Nithi	K80	Biofix	45.7	15	75	0.548	18.2	24.3333	1581.67	15.2	11.6889
one	Tharaka Nithi	K80	Consortiun	63.3	34	194	1.029	18.2	33.2333	2160.17	11.4	8.11111
one	Tharaka Nithi	K80	Control	38.8	15	23	0.079	12	8.06667	524.333	10.6	10.8667
one	Tharaka Nithi	M66	Native	51.3	17	40	0.079	20.1	19.1667	1245.83	13.4	5.43333
one	Tharaka Nithi	M66	Biofix	48	16	51	0.298	19.5	11.1667	725.833	10.9	8.15556
one	Tharaka Nithi	M66	Consortiun	54.3	26	74	0.517	15.3	22.5333	1464.67	9.9	9.46667
one	Tharaka Nithi	M66	Control	40	21	22	0.091	26.4	11.2	728	9.5	10.8556
one	Tharaka Nithi	KVU	Native	56.6	30	105	0.804	33.7	10.7	695.5	13.4	7.22222
one	Tharaka Nithi	KVU	Biofix	46.7	11	129	0.359	33.7	11.2	728	13	17.6667
one	Tharaka Nithi	KVU	Consortiun	47.3	14	39	0.157	40.7	12.5333	814.667	13.9	13.9
one	Tharaka Nithi	KVU	Control	41.7	11	17	0.049	16.5	9.7	630.5	9.7	13.0222
one	Tharaka Nithi	K80	Native	52.7	14	29	0.024	13.1	16.5	1072.5	11.5	18
one	Tharaka Nithi	K80	Biofix	154	26	102	0.695	21.1	6.96667	452.833	10.4	11.7444
one	Tharaka Nithi	K80	Consortiun	53	19	79	0.341	50.1	23.4333	1523.17	11.5	7.96667
one	Tharaka Nithi	K80	Control	34.7	10	49	0.104	15.1	9.3	604.5	9.8	6.95556
one	Tharaka Nithi	M66	Native	51	16	91	0.404	17.2	27	1755	11.7	8.65556
one	Tharaka Nithi	M66	Biofix	48	16	59	0.399	23.2	20.6667	1343.33	10.4	7.83333
one	Tharaka Nithi	M66	Consortiun	49	17	13	0.88	20.9	31	2015	13.5	6.41111
one	Tharaka Nithi	M66	Control	35.7	17	31	0.224	11	10	650	9.1	10.2556
one	Tharaka Nithi	KVU	Native	52	22	34	0.294	29.4	10.6667	693.333	14.5	8.42222
one	Tharaka Nithi	KVU	Biofix	65.3	29	101	0.484	16.1	9.3	604.5	12.8	9.82222
one	Tharaka Nithi	KVU	Consortiun	48.3	17	49	0.205	26.8	15.5667	1011.83	12.9	6.16667
one	Tharaka Nithi	KVU	Control	35.3	11	21	0.067	15.7	7.46667	485.333	11	5.62222
one	Tharaka Nithi	K80	Native	51.7	23	40	0.141	44.2	13.6667	888.333	12.5	4.97778
one	Tharaka Nithi	K80	Biofix	51.3	22	97	0.714	49.2	22.7	1475.5	11.9	10.6333
one	Tharaka Nithi	K80	Consortiun	47.3	24	109	0.941	27.6	20.8667	1356.33	16.9	7.56667
one	Tharaka Nithi	K80	Control	36	15	37	0.102	16.3	10.1333	658.667	10.4	7.3
one	Tharaka Nithi	M66	Native	34.3	19	34	0.477	15.5	27.6333	1796.17	11.4	9.42222
one	Tharaka Nithi	M66	Biofix	48	16	69	0.444	20	32.6667	2123.33	12.6	9.52222
one	Tharaka Nithi	M66	Consortiun	74.7	35	129	0.699	36.9	25	1625	12.6	10.8889
one	Tharaka Nithi	M66	Control	33.3	9	15	0.044	17.9	25.0333	1627.17	10.7	11.4889
one	Tharaka Nithi	KVU	Native	51	22	69	0.318	44.5	23.8667	1551.33	19.1	8.34444
one	Tharaka Nithi	KVU	Biofix	57.3	24	107	0.539	12.2	26.8333	1744.17	17.8	10.8556
one	Tharaka Nithi	KVU	Consortiun	55.3	17	121	0.964	12	21.0667	1369.33	16.9	9.38889
one	Tharaka Nithi	KVU	Control	34	10	34	0.104	13.4	14.9333	970.667	10.9	8.82222
one	Tharaka Nithi	K80	Native	79.4	38	34	0.181	14.2	24.3333	1581.67	12.8	9.42222
one	Tharaka Nithi	K80	Biofix	41.3	17	67	0.297	29	26.6	1729	14.7	26.6333
one	Tharaka Nithi	K80	Consortiun	59.3	33	73	0.327	21.1	19.9	1293.5	12.2	14.8
one	Tharaka Nithi	K80	Control	50.3	11	32	0.338	32.1	22	1430	11.4	10.8667
one	Tharaka Nithi	M66	Native	54.7	22	69	0.332	52	28.6667	1863.33	12.6	13.1778
one	Tharaka Nithi	M66	Biofix	60.3	19	63	0.42	22.4	20.8333	1354.17	11.5	15.1889
one	Tharaka Nithi	M66	Consortiun	49.3	16	94	0.498	18	43.9	2853.5	13.4	15.1889
one	Tharaka Nithi	M66	Control	81.3	30	16	0.042	17.1	18.3333	1191.67	9.3	11.5556
one	Tharaka Nithi	KVU	Native	57	32	47	0.149	40.1	28.0667	1824.33	11.2	5.56667
one	Tharaka Nithi	KVU	Biofix	45	25	152	0.941	7.7	33.8	2197	12.7	7.57778
one	Tharaka Nithi	KVU	Consortiun	70	33	54	0.145	51.5	24.1333	1568.67	11.3	18.4556
one	Tharaka Nithi	KVU	Control	53.7	22	17	0.051	8.1	22.4333	1458.17	12.3	21.4333
one	Tharaka Nithi	K80	Native	48	19	74	0.168	8.1	17.0333	1107.17	10.8	10.2556
one	Tharaka Nithi	K80	Biofix	43	19	76	0.403	10.1	29.7667	1934.83	14.7	9.96667
one	Tharaka Nithi	K80	Consortiun	39.3	15	107	0.513	60.8	26.3333	1711.67	11.8	8.03333
one	Tharaka Nithi	K80	Control	65	23	10	0.027	29.9	17.9	1163.5	11.2	13.2111
one	Tharaka Nithi	M66	Native	55.3	23	29	0.071	18.3	30.6	1989	12.7	9.55556
one	Tharaka Nithi	M66	Biofix	69.7	35	17	0.877	57	21.2333	1380.17	10.9	17.9111
one	Tharaka Nithi	M66	Consortiun	49.3	32	64	0.877	10.2	26.5667	1726.83	11.4	10.8556
one	Tharaka Nithi	M66	Control	57.7	27	19	0.087	10	9.73333	632.667	10	23.2111
one	Tharaka Nithi	KVU	Native	54.3	23	29	0.654	32.3	23.2333	1510.17	12.1	5.56667
one	Tharaka Nithi	KVU	Biofix	38	17	49	0.169	31.4	27.9	1813.5	15.7	9.31111
one	Tharaka Nithi	KVU	Consortiun	59.7	31	50	0.437	50.1	27.5667	1791.83	12.9	13.0333
one	Tharaka Nithi	KVU	Control	67.7	27	24	0.104	10.5	13.1667	855.833	10.8	22.6111
one	Tharaka Nithi	K80	Native	58.3	21	39	0.194	12.9	14.3	929.5	11.5	25.1333
one	Tharaka Nithi	K80	Biofix	78.3	30	49	0.45	15	11.5667	751.833	12.1	3.14444
one	Tharaka Nithi	K80	Consortiun	55	35	104	0.936	28.7	11.2	728	15.2	14.8
one	Tharaka Nithi	K80	Control	62.7	35	12	0.049	10.1	11.9333	775.667	10.6	16.2111
one	Tharaka Nithi	M66	Native	50.3	20	74	0.224	32.5	18.2667	1187.33	13.3	14.0444
one	Tharaka Nithi	M66	Biofix	52.7	26	25	0.179	26.1	12.6667	823.333	12.1	6.13333
one	Tharaka Nithi	M66	Consortiun	66.7	19	46	0.189	40.6	15.7333	1022.67	10.9	10.8556
one	Tharaka Nithi	M66	Control	47.3	12	16	0.066	6.8	11.2	728	11.7	6.5
one	Tharaka Nithi	KVU	Native	60.7	27	96	0.766	30.1	37.7667	2454.83	16.2	10.4778
one	Tharaka Nithi	KVU	Biofix	61	34	51	0.196	69.7	53.7	3490.5	14.9	9.12222
one	Tharaka Nithi	KVU	Consortiun	40.7	19	47	0.149	40.1	23.2667	1512.33	11.9	13.0333
one	Tharaka Nithi	KVU	Control	46.7	20	19	0.017	16.7	15.6333	1016.17	10.2	7.17778
one	Embu	K80	Native	72.9	21	17	0.0383	8.2	0.166667	10.8333	5	0
one	Embu	K80	Biofix	142.7	64	13	0.0913	45	1.2	78	9.5	25.7333
one	Embu	K80	Consortiun	107.9	62	21	0.08	12	0	0	0	30.3333
one	Embu	K80	Control	67.1	23	17	0.1603	13.3	0	0	0	14.1
one	Embu	M66	Native	124.2	53	21	0.1007	45.8	7.2	468	9.4	25.2
one	Embu	M66	Biofix	118.9	38	14	0.085	26.9	0	0	0	25.1889
one	Embu	M66	Consortiun	63.3	32	20.6667	0.0763	9.3	1.46667	95.3333	8.3	20.3333
one	Embu	M66	Control	142.7	39	17	0.0717	49.3	0.233333	15.1667	4.6	20.3444
one	Embu	KVU	Native	68.7	24	11	0.0197	12.6	0.633333	41.1667	7	29.2667
one	Embu	KVU	Biofix	106.5	27	7	0.043	14.7	1.3	84.5	10	34.9
one	Embu	KVU	Consortiun	78.3	30	7	0.0217	16	1.76667	114.833	7.4	17.3333
one	Embu	KVU	Control	125.1	55	12	0.1327	33.6	0.733333	47.6667	9.8	17.3222
one	Embu	K80	Native	98.7	40	17	0.0503	20.9	0	0	0	19.6333
one	Embu	K80	Biofix	143.6	61	8	0.037	46.3	0.233333	15.1667	3.7	19.6222
one	Embu	K80	Consortiun	81.2	21	19	0.1083	10.1	0	0	0	32.4
one	Embu	K80	Control	70.4	34	26	0.07	9.5	0	0	0	13.5667
one	Embu	M66	Native	82	29	24	0.1037	13.3	0.8	52	7.3	34.1
one	Embu	M66	Biofix	111.1	39	20	0.1687	32	0	0	0	27.7667
one	Embu	M66	Consortiun	71.8	23	16	0.049	11.2	0	0	0	25
one	Embu	M66	Control	152.3	48	14	0.0757	32.9	0.9	58.5	6	20.1667
one	Embu	KVU	Native	97.8	24	19	0.0787	17.7	1	65	6.5	26.3667
one	Embu	KVU	Biofix	105.9	35	14	0.0248	17.8	0.0666667	4.33333	2.5	15.5667
one	Embu	KVU	Consortiun	88.1	20	11	0.0607	15	0.833333	54.1667	6	15.5556
one	Embu	KVU	Control	120.9	39	36	0.1103	25.8	0	0	0	47.6667
one	Embu	K80	Native	60.2	25	22	0.0493	13.9	0	0	0	44.8333
one	Embu	K80	Biofix	112	42	39	0.0767	17.8	0.2	13	3.3	44.8222
one	Embu	K80	Consortiun	84.1	50	16	0.099	27.1	0.266667	17.3333	5	38.9667
one	Embu	K80	Control	62.8	27	28	0.06	17.8	0	0	0	18.6667
one	Embu	M66	Native	85.7	21	28	0.114	9.1	2.13333	138.667	7.1	18.6778
one	Embu	M66	Biofix	64.9	28	22	0.1057	9.7	1.7	110.5	6.3	37.9333
one	Embu	M66	Consortiun	98.7	31	20	0.116	18.9	1.06667	69.3333	4.8	17.9
one	Embu	M66	Control	140.5	43	24	0.1173	38.5	0.5	32.5	7.9	18.7333
one	Embu	KVU	Native	154.8	51	24	0.1587	40.7	5.76667	374.833	11.2	18.7444
one	Embu	KVU	Biofix	85.3	18	11	0.1163	12.3	0.566667	36.8333	5.7	36.0333
one	Embu	KVU	Consortiun	66.5	25	21	0.07	12	4.56667	296.833	13.7	36.8
one	Embu	KVU	Control	74.1	35	38	0.1983	16	1.1	71.5	4.3	26.7889
one	Embu	K80	Native	73.2	22	48	0.2147	4.9	3.46667	225.333	8.8	34.4333
one	Embu	K80	Biofix	63.6	22	34	0.1357	11.5	0.966667	62.8333	9.1	10.4667
one	Embu	K80	Consortiun	61.9	24	48	0.176	14.3	0.2	13	6.7	19.4667
one	Embu	K80	Control	58.1	20	25	0.101	7.7	0.366667	23.8333	5.8	11.2
one	Embu	M66	Native	71.3	38	27	0.0933	16.5	1.7	110.5	8	16.2333
one	Embu	M66	Biofix	70.7	222	30	0.1827	5.8	6.83333	444.167	10.2	15.9667
one	Embu	M66	Consortiun	70.4	17	23	0.1117	12.5	10.7667	699.833	11.7	22.6333
one	Embu	M66	Control	67.8	23	65	0.2513	12.1	2	130	1.1	19.5
one	Embu	KVU	Native	24.8	23	22	0.145	13.1	2.4	156	15.3	10.7333
one	Embu	KVU	Biofix	59.3	23	26	0.1383	10.9	7.46667	485.333	13.6	10.7444
one	Embu	KVU	Consortiun	108	33	59	0.333	12.3	2.56667	166.833	9.6	19.6
one	Embu	KVU	Control	74.9	33	26	0.0857	12.9	0.633333	41.1667	6.7	17.6
one	Embu	K80	Native	84.2	26	38	0.1003	12.2	0.333333	21.6667	7.4	21.0333
one	Embu	K80	Biofix	96.4	23	32	0.117	7.7	0	0	0	21.0556
one	Embu	K80	Consortiun	64.4	25	28	0.099	11.6	0	0	0	24.4333
one	Embu	K80	Control	58.7	18	42	0.1563	5.9	1.16667	75.8333	6.5	12.1667
one	Embu	M66	Native	79	23	31	0.232	10.3	2.26667	147.333	8.1	15.3667
one	Embu	M66	Biofix	81.8	25	28	0.1473	9.1	0.733333	47.6667	7.9	15.3778
one	Embu	M66	Consortiun	85.2	31	40	0.2357	11.9	3.53333	229.667	7.7	10.6667
one	Embu	M66	Control	75.7	33	32	0.1587	10.9	0.333333	21.6667	5.9	10.6556
one	Embu	KVU	Native	71.8	25	27	0.0953	10.9	1.2	78	7.4	17.9667
one	Embu	KVU	Biofix	70	46	32	0.1467	11.7	2.16667	140.833	8.2	8.7
one	Embu	KVU	Consortiun	115.5	54	51	0.3433	15.5	1.56667	101.833	9.6	40.6333
one	Embu	KVU	Control	62.7	23	43	0.189	12.9	0.966667	62.8333	6.7	16.9667
one	Embu	K80	Native	85	36	34	0.104	14.1	3.53333	229.667	10.1	21.9556
one	Embu	K80	Biofix	68.5	26	33	0.137	10.7	2.96667	192.833	10	16
one	Embu	K80	Consortiun	77.2	21	36	0.1983	14.6	2.3	149.5	9.6	10.8667
one	Embu	K80	Control	88.9	21	29	0.1017	8.6	2.8	182	6.7	12.1333
one	Embu	M66	Native	84.9	25	22	0.16	11.9	1.3	84.5	7.5	12.1222
one	Embu	M66	Biofix	108.6	29	32	0.1927	12.8	3.43333	223.167	8.4	11.7333
one	Embu	M66	Consortiun	85.4	36	38	0.1083	14.1	0.166667	10.8333	4.6	11.7222
one	Embu	M66	Control	86.9	22	30	0.1173	11.4	0.166667	10.8333	7.1	12.5333
one	Embu	KVU	Native	79	15	37	0.2947	12.2	3.33333	216.667	1.08	12.5444
one	Embu	KVU	Biofix	85.2	35	31	0.154	14.1	0.2	13	10	14.0667
one	Embu	KVU	Consortiun	81	33	38	0.2127	23.8	0.866667	56.3333	11.3	12.9556
one	Embu	KVU	Control	105.8	27	21	0.074	11.8	0.433333	28.1667	6.8	11.4222
one	Embu	K80	Native	71.1	29	11	0.024	11	0	0	0	7.08889
one	Embu	K80	Biofix	84.6	48	27	0.067	27.3	0	0	0	18.7
one	Embu	K80	Consortiun	63.7	45	42	0.128	22.2	0.633333	41.1667	7.31	26.0667
one	Embu	K80	Control	56.4	28	27	0.1597	12	0.366667	23.8333	2.5	35.0556
one	Embu	M66	Native	77.7	37	32	0.0973	16.8	1.53333	99.6667	6.9	32.3
one	Embu	M66	Biofix	77.6	34	19	0.0937	19.6	1.1	71.5	7.2	27.9889
one	Embu	M66	Consortiun	108.5	24	9	0.025	25.4	0.3	19.5	5.3	35.2667
one	Embu	M66	Control	113.1	33	21	0.095	36.4	0	0	0	20.0778
one	Embu	KVU	Native	57.7	37	28	0.095	12	0	0	0	24.7
one	Embu	KVU	Biofix	68	27	22	0.0473	15.4	0	0	0	39.4889
one	Embu	KVU	Consortiun	58.7	15	20	0.034	6.7	0	0	0	23.6556
one	Embu	KVU	Control	60.5	8	17	0.0457	4.1	0.433333	28.1667	5.3	39.4889
one	Embu	K80	Native	70.9	34	23	0.0887	24.8	0	0	0	18.0444
one	Embu	K80	Biofix	63	24	18	0.0487	13.5	0.166667	10.8333	4.2	20.7111
one	Embu	K80	Consortiun	55	28	23	0.088	3.5	0	0	0	38.5444
one	Embu	K80	Control	78.8	46	23	0.0567	23.2	0	0	0	23.1556
one	Embu	M66	Native	64.7	30	26	0.101	16.1	0.1	6.5	7.5	28.3889
one	Embu	M66	Biofix	51.8	14	29	0.06	11.8	1.26667	82.3333	7.6	40.3333
one	Embu	M66	Consortiun	81.6	26	27	0.0857	16.7	1.2	78	5.9	14.5222
one	Embu	M66	Control	97.4	27	16	0.0973	35.6	0.466667	30.3333	7.4	16.1778
one	Embu	KVU	Native	59.1	29	18	0.0623	15.5	0.933333	60.6667	6.4	21.2444
one	Embu	KVU	Biofix	64.5	32	14	0.0403	15.6	0.633333	41.1667	9.5	25.3556
one	Embu	KVU	Consortiun	87.2	28	18	0.0383	13.1	0.933333	60.6667	6.4	21.3444
one	Embu	KVU	Control	71.3	37	19	0.0943	17.3	0	0	0	25.3556
one	Embu	K80	Native	48	26	30	0.0757	13.4	0.133333	8.66667	3.1	15.9111
one	Embu	K80	Biofix	65.4	29	29	0.0357	11.1	0.466667	30.3333	7	28.8111
one	Embu	K80	Consortiun	79.3	39	29	0.0547	24.8	0.0666667	4.33333	6.7	15.5667
one	Embu	K80	Control	71.4	31	25	0.0817	13.4	0.1	6.5	2.5	13.6333
one	Embu	M66	Native	53.5	33	21	0.036	16.3	1.5	97.5	8	38.4333
one	Embu	M66	Biofix	66.7	30	24	0.102	5.7	1.33333	86.6667	10.8	42.5111
one	Embu	M66	Consortiun	69.7	30	33	0.0847	15.8	0.666667	43.3333	10.5	24.3889
one	Embu	M66	Control	82.2	32	16	0.081	23.1	4.03333	262.167	11.2	19.2444
one	Embu	KVU	Native	96.7	62	22	0.062	37.4	0.7	45.5	12.4	22.6889
one	Embu	KVU	Biofix	75.4	27	25	0.0487	13	2.23333	145.167	8.2	12.6556
one	Embu	KVU	Consortiun	48.2	16	15	0.0227	8.4	0.7	45.5	12.4	20
one	Embu	KVU	Control	64.2	18	26	0.1023	8.1	0.7	45.5	9.1	12.6556
one	Embu	K80	Native	48	24	30	0.0943	14.7	0.0666667	4.33333	2.5	26.5889
one	Embu	K80	Biofix	64.3	26	32	0.0873	10.9	0	0	0	27.9889
one	Embu	K80	Consortiun	56.7	23	18	0.0667	9.2	0.533333	34.6667	5.3	20.9667
one	Embu	K80	Control	35.3	6	10	0.066	2.5	0	0	0	11.2222
one	Embu	M66	Native	48	23	26	0.058	13.2	0	0	0	19.6889
one	Embu	M66	Biofix	54.5	19	21	0.0863	13.1	0.2	13	3.9	11.7222
one	Embu	M66	Consortiun	42	16	19	0.0467	7.1	0	0	0	20.5778
one	Embu	M66	Control	46.7	30	18	0.0563	18.1	0.566667	36.8333	6.7	33.9889
one	Embu	KVU	Native	95	32	22	0.113	25.3	0	0	0	16.5667
one	Embu	KVU	Biofix	54	23	26	0.073	11.5	0.766667	49.8333	7.42	24.9889
one	Embu	KVU	Consortiun	62.7	32	16	0.1187	13.7	0	0	0	21.7556
one	Embu	KVU	Control	45.2	16	15	0.033	11.2	0	0	0	20.1556
one	Embu	K80	Native	50	15	28	0.0717	13.3	0	0	0	16.6889
one	Embu	K80	Biofix	42.3	23	20	0.073	13.1	0	0	0	34.4333
one	Embu	K80	Consortiun	59.3	25	20	0.0587	12.1	0	0	0	20.5556
one	Embu	K80	Control	52.7	31	27	0.0543	9.9	0	0	0	39.2333
one	Embu	M66	Native	45.7	18	15	0.071	12	0.3	19.5	6.9	21.4
one	Embu	M66	Biofix	48	20	24	0.0687	11.4	0.166667	10.8333	4.2	29.9667
one	Embu	M66	Consortiun	51.9	22	22	0.0863	10.9	0.9	58.5	6.6	22.1778
one	Embu	M66	Control	27	17	12	0.0433	4.1	0.566667	36.8333	7.8	18.9
one	Embu	KVU	Native	51.3	27	20	0.165	16.8	0.0333333	2.16667	1.42	30.0667
one	Embu	KVU	Biofix	66.7	33	40	0.157	12.3	0.1	6.5	2.31	17.7222
one	Embu	KVU	Consortiun	54.3	36	20	0.1323	14.2	0	0	0	16.8889
one	Embu	KVU	Control	67.7	28	17	0.0893	6.2	0	0	0	31.2889
one	Embu	K80	Native	48.7	23	23	0.0437	9.2	0.266667	17.3333	4.4	17.7889
one	Embu	K80	Biofix	54.7	23	8	0.0313	12.5	0.4	26	6	22.5556
one	Embu	K80	Consortiun	57.7	33	10	0.0323	9.7	0	0	0	22.1889
one	Embu	K80	Control	39.7	28	23	0.094	1.3	0	0	0	29.7
one	Embu	M66	Native	50.7	24	16	0.07	15.3	0.6	39	6.4	13.4111
one	Embu	M66	Biofix	54.3	21	18	0.0717	10.3	0	0	0	36.0556
one	Embu	M66	Consortiun	39.7	28	13	0.0767	22	0.433333	28.1667	3.5	31.2333
one	Embu	M66	Control	56.5	26	18	0.0677	13.9	0.133333	8.66667	8	32
one	Embu	KVU	Native	61.3	28	11	0.051	15.6	0	0	0	35.0889
one	Embu	KVU	Biofix	63.8	31	14	0.048	21	0.166667	10.8333	4.55	18.8444
one	Embu	KVU	Consortiun	36.3	24	19	0.0443	18.5	0.0333333	2.16667	5	18.8222
one	Embu	KVU	Control	59.6	23	31	0.1073	20.4	0.566667	36.8333	8.5	21.4222
one	Embu	K80	Native	93	63	22	0.056	14	0	0	0	24.2111
one	Embu	K80	Biofix	63	32	26	0.11	12.8	0.6	39	13.9	29.5333
one	Embu	K80	Consortiun	79.6	39	26	0.1093	16.8	0	0	0	11.7444
one	Embu	K80	Control	72.8	34	21	0.1527	14.1	0	0	0	15.1889
one	Embu	M66	Native	68.5	28	30	0.1863	14.7	0	0	0	15.5556
one	Embu	M66	Biofix	63.1	22	28	0.149	9.7	0.666667	43.3333	10.5	35.5778
one	Embu	M66	Consortiun	53.4	23	17	0.056	8.6	0.1	6.5	2.5	18.9667
one	Embu	M66	Control	96.7	34	8	0.0593	22.6	0.0666667	4.33333	4	15.3333
one	Embu	KVU	Native	54.5	24	24	0.093	12.9	0.533333	34.6667	7	34.7778
one	Embu	KVU	Biofix	70	24	19	0.262	11	0.3	19.5	5.3	27.2556
one	Embu	KVU	Consortiun	56.7	24	23	0.1627	8.2	0.566667	36.8333	5.5	20.6556
one	Embu	KVU	Control	82.4	12	19	0.0887	6.7	0.233333	15.1667	8.8	32.1556
one	Embu	K80	Native	39.9	17.7	20	0.0293	3.8	0.2	13	8.6	16.4778
one	Embu	K80	Biofix	101.5	44	24	0.199	33.2	0	0	0	21.9889
one	Embu	K80	Consortiun	63.4	27	28	0.143	29.9	0	0	0	20.1333
one	Embu	K80	Control	63.9	27	23	0.1377	8	0.8	52	14.1	18.6444
one	Embu	M66	Native	60.9	11	19	0.0873	11.6	0	0	0	17.8889
one	Embu	M66	Biofix	73.5	25	24	0.1143	12.8	0.9	58.5	7.1	17.3333
one	Embu	M66	Consortiun	69.5	26	32	0.135	10.6	0	0	0	20.4
one	Embu	M66	Control	69.8	27	13	0.114	12.9	0.233333	15.1667	4.4	21.6889
one	Embu	KVU	Native	114.6	40	11	0.0433	30.3	0	0	0	24.3333
one	Embu	KVU	Biofix	63.2	23	44	0.184	13.1	0.933333	60.6667	6.2	23
one	Embu	KVU	Consortiun	74.7	33	36	0.1853	16	0.233333	15.1667	5.38	14.9
one	Embu	KVU	Control	58.4	42	18	0.0607	20.6	0	0	0	19.7222
one	Embu	K80	Native	55	26	23	0.103	9.6	0.233333	15.1667	4.7	14.4889
one	Embu	K80	Biofix	74.2	33	22	0.092	19.5	0	0	0	26.4333
one	Embu	K80	Consortiun	101.2	29	22	0.13	24.3	0.3	19.5	5	18.7
one	Embu	K80	Control	53.3	28	25	0.1127	9.1	0	0	0	19.1556
one	Embu	M66	Native	47.2	22	31	0.1343	8.4	1.36667	88.8333	5.7	20.8111
one	Embu	M66	Biofix	54.1	23	19	0.0917	10.8	0	0	0	20.9778
one	Embu	M66	Consortiun	55.4	25	18	0.0843	13	0	0	0	27.8444
one	Embu	M66	Control	117.1	27	23	0.131	30.6	0.366667	23.8333	8.5	22.8778
one	Embu	KVU	Native	95.7	39	18	0.077	24.9	0.266667	17.3333	4	23.2
one	Embu	KVU	Biofix	120.2	45	19	0.0833	25.5	0.3	19.5	5.6	8.53333
one	Embu	KVU	Consortiun	80.3	29	29	0.203	17.6	0.1	6.5	2.1	19.2667
one	Embu	KVU	Control	121.3	35	13	0.1237	26.4	3.7	240.5	11	14.0556
one	Kitui	K80	Native	38.6667	18.6667	23	0.352933	6.66667	27.3667	1778.83	9.1	23.7889
one	Kitui	K80	Biofix	38.3333	23	39	0.237667	9.03333	10.4333	678.167	16	11.1889
one	Kitui	K80	Consortiun	45	30	22	0.4561	11.8	8.53333	554.667	14.4	11.2889
one	Kitui	K80	Control	36	12	8	0.0806	4.4	8.8	572	12.1	11.9444
one	Kitui	M66	Native	46	19	25	0.4618	9.7	27.2667	1772.33	10.8	14.1556
one	Kitui	M66	Biofix	58	22	12	0.1574	8.9	9.26667	602.333	12.2	10.5333
one	Kitui	M66	Consortiun	79	37	25	0.0703	21.1	16.9333	1100.67	15.4	12.3444
one	Kitui	M66	Control	44	20	11	0.0365	8.5	2.43333	158.167	10.2	8.98889
one	Kitui	KVU	Native	65	29	37	0.0438	13	10.3333	671.667	14.1	8.92222
one	Kitui	KVU	Biofix	44	28	26	0.3708	10.6	9.7	630.5	13.8	11.4
one	Kitui	KVU	Consortiun	43	21	12	0.2285	5.7	7.46667	485.333	12.5	9
one	Kitui	KVU	Control	39	19	28	0.0801	6.7	16.1	1046.5	15.3	17.3444
one	Kitui	K80	Native	35	21.3333	15	0.492	7.2	11.1	721.5	13.7	11.4667
one	Kitui	K80	Biofix	36.6667	19.3333	12	0.123367	8	13.7667	894.833	11.8	12.1111
one	Kitui	K80	Consortiun	53.3333	28	13	0.111367	9.16667	9.16667	595.833	13.6	13.2444
one	Kitui	K80	Control	53.6667	34.3333	44.3333	0.275633	15.2333	14.0333	912.167	10.8	15.2111
one	Kitui	M66	Native	37.6667	18.6667	12.6667	0.218433	8.76667	4.26667	277.333	12.4	6.23333
one	Kitui	M66	Biofix	61.3333	34.3333	24.3333	0.136533	17.0667	2.9	188.5	10.3	11.3667
one	Kitui	M66	Consortiun	40.6667	17.3333	14	0.146733	7.13333	13.8333	899.167	13	16.4444
one	Kitui	M66	Control	36	20	4	0.0803	9.33333	7.76667	504.833	11.7	11.5444
one	Kitui	KVU	Native	37.6667	13.6667	17.3333	0.0582	4.33333	20.2	1313	12.7	13.4667
one	Kitui	KVU	Biofix	43.3333	14.6667	22	0.1652	6.5	5.76667	374.833	13.1	8.93333
one	Kitui	KVU	Consortiun	34.6667	15.6667	4	0.160133	6.63333	3.7	240.5	9.9	6.94444
one	Kitui	KVU	Control	40.6667	13	14	0.0439667	5.66667	6.56667	426.833	14.2	12.2
one	Kitui	K80	Native	37	16.6667	15	0.1556	5.56667	3.03333	197.167	10.7	9.98889
one	Kitui	K80	Biofix	47	36	10	0.1105	13.6	10.2	663	12.3	15.7
one	Kitui	K80	Consortiun	34.3333	20	7	0.0115333	8.36667	17.2	1118	10.8	9.52222
one	Kitui	K80	Control	30.6667	11.6667	8	0.0358667	4.53333	8.63333	561.167	12.3	10.6667
one	Kitui	M66	Native	34.6667	21.3333	6.66667	0.1106	6.4	6.36667	413.833	9.9	8.54444
one	Kitui	M66	Biofix	42	20.3333	11	0.0929667	8.36667	6	390	11.9	14.3111
one	Kitui	M66	Consortiun	29.6667	15.3333	18	0.0966667	7.43333	10.8333	704.167	12.3	14.1556
one	Kitui	M66	Control	36	12.3333	10.6667	0.0861	5.86667	13.6333	886.167	14.6	14.2222
one	Kitui	KVU	Native	50.3333	25.3333	9	0.0236667	12.0667	12.7333	827.667	12.4	9.24444
one	Kitui	KVU	Biofix	40	19	20.6667	0.120667	7.96667	14.9667	972.833	14.6	12.1111
one	Kitui	KVU	Consortiun	46	15.6667	34	0.162	6.43333	9.86667	641.333	12.3	8.33333
one	Kitui	KVU	Control	30.3333	12	11.6667	0.0584	5.96667	10.2	663	13.6	9.9
one	Kitui	K80	Native	49.3333	20.3333	31	0.3118	16.7	4.76667	309.833	10.7	9.23333
one	Kitui	K80	Biofix	55	42.3333	50	0.094	21.0667	22.0667	1434.33	12.1	5.85556
one	Kitui	K80	Consortiun	44	36.3333	45	0.1246	10.6333	18.8667	1226.33	10.8	7.34444
one	Kitui	K80	Control	48	35.3333	50.3333	0.217833	8.33333	19.1667	1245.83	8.8	8.51111
one	Kitui	M66	Native	54	32.6667	35.3333	0.451	13.5	20.4	1326	10.4	7.7
one	Kitui	M66	Biofix	50.3333	22.6667	40.6667	0.257	9.83333	27.2	1768	11.5	9.18889
one	Kitui	M66	Consortiun	46	26.3333	39.3333	0.372033	9.36667	15.6667	1018.33	13.4	5.42222
one	Kitui	M66	Control	42.6667	15	7.33333	0.0572333	5.5	28.0333	1822.17	13	11.5444
one	Kitui	KVU	Native	55.3333	28.3333	48.6667	0.372033	12.3	13.3667	868.833	10	6.52222
one	Kitui	KVU	Biofix	63.3333	28.6667	21.6667	0.155167	10.7	27.3333	1776.67	12.4	9.92222
one	Kitui	KVU	Consortiun	65	35.6667	48.3333	0.304067	14.4667	30.9333	2010.67	13.3	10.0667
one	Kitui	KVU	Control	32.6667	12.3333	23.6667	0.2295	3.96667	25.9	1683.5	11.8	10.4
one	Kitui	K80	Native	50	19.3333	47.6667	0.450167	11.0667	31.7333	2062.67	11.2	12.9222
one	Kitui	K80	Biofix	59.6667	23.6667	54.3333	0.367867	16.3667	22.9	1488.5	12.1	10.6778
one	Kitui	K80	Consortiun	45	30.6667	20.3333	0.0797	7.63333	29.0667	1889.33	10.8	10.8222
one	Kitui	K80	Control	40.3333	23.6667	28.3333	0.132067	11.1	23.5333	1529.67	11.1	10.5
one	Kitui	M66	Native	45	23.6667	17	0.1433	8.13333	40.8	2652	14	11.7
one	Kitui	M66	Biofix	40.3333	20	46.3333	0.2167	5.93333	23.1667	1505.83	10.2	7.96667
one	Kitui	M66	Consortiun	46.6667	26.6667	15.3333	0.0705333	8	26.2333	1705.17	12.1	14.4222
one	Kitui	M66	Control	64	29.6667	43.3333	0.2271	18.9	28.1	1826.5	11.9	12.0444
one	Kitui	KVU	Native	48.3333	35	46.3333	0.0884333	12.2333	8.9	578.5	10.8	14.5111
one	Kitui	KVU	Biofix	57.6667	23.3333	25	0.1652	10.0667	22.9	1488.5	10.9	5.02222
one	Kitui	KVU	Consortiun	54.6667	22	8.33333	0.2376	13.2	23.2	1508	11.3	9.28889
one	Kitui	KVU	Control	46.3333	23.3333	32	0.147167	8.73333	40.9667	2662.83	14	12.5444
one	Kitui	K80	Native	69.6667	23.3333	8	0.0923	11.4	48.0667	3124.33	11.1	27.3556
one	Kitui	K80	Biofix	51.6667	26	18.3333	0.1482	11.1667	37.3333	2426.67	10.9	17.5444
one	Kitui	K80	Consortiun	48.3333	15.6667	8.66667	0.0661667	13.8	40.5667	2636.83	11.6	17.1444
one	Kitui	K80	Control	55.6667	35.3333	28.6667	0.178833	16.7	32.6333	2121.17	12.1	13.7778
one	Kitui	M66	Native	65	28.6667	8.66667	0.0200667	12.3	25.7667	1674.83	12.4	16.5444
one	Kitui	M66	Biofix	72.3333	21.6667	33.3333	0.0989333	4.43333	17.1	1111.5	12.5	11.3444
one	Kitui	M66	Consortiun	44	23.3333	2.33333	0.0288333	8.56667	29.3667	1908.83	12.2	15.0444
one	Kitui	M66	Control	55.6667	17.3333	9.66667	0.0288333	4.9	34.1667	2220.83	11.4	15.8444
one	Kitui	KVU	Native	41	16.6667	22	0.115967	7.2	45.4333	2953.17	12.5	17.9444
one	Kitui	KVU	Biofix	59.3333	24	26.6667	0.463467	5.66667	32.5333	2114.67	13.4	14.2444
one	Kitui	KVU	Consortiun	67.6667	18.3333	16	0.0292444	14.6667	23.5333	1529.67	11.4	11.7444
one	Kitui	KVU	Control	36	9	19.6667	0.0356	3.13333	22.7	1475.5	15.1	11.5333
one	Kitui	K80	Native	62	42	21	0.072	19.5667	7.05	458.25	10.4	18.3333
one	Kitui	K80	Biofix	35	7.33333	11.6667	0.0952667	2.5	12.5	812.5	14.6	10.8
one	Kitui	K80	Consortiun	30	12.3333	8.66667	0.0870333	4.66667	10.85	705.25	13.1	14.8667
one	Kitui	K80	Control	43.6667	16	5.66667	0.0298	5.16667	10.85	705.25	12.3	8.56667
one	Kitui	M66	Native	41	15	16	0.0257	6.93333	10.05	653.25	11.1	8.96667
one	Kitui	M66	Biofix	60	38	15	0.1003	17.6	7.85	510.25	12.2	16.6167
one	Kitui	M66	Consortiun	51.6667	23.6667	16.3333	0.2455	10.1	13.7	890.5	11.7	10.3
one	Kitui	M66	Control	41.3333	20.3333	11.3333	0.0564333	8.23333	10.1	656.5	12.8	9.86667
one	Kitui	KVU	Native	43	12.6667	11.6667	0.0733	5.23333	16.7	1085.5	12.8	10.1167
one	Kitui	KVU	Biofix	44.3333	22.3333	10	0.0248	8.63333	11.85	770.25	13	20.6667
one	Kitui	KVU	Consortiun	44	17	9.66667	0.0341667	7.6	7.05	458.25	10.8	20.1167
one	Kitui	KVU	Control	34	8.33333	7	0.0233333	2.4	10.45	679.25	12.7	7.48333
one	Kitui	K80	Native	45.3333	25.6667	15.6667	0.0876667	9.76667	18.75	1218.75	11.3	17.0333
one	Kitui	K80	Biofix	45.6667	22	20.6667	0.116933	9.13333	19.55	1270.75	10.7	12.7833
one	Kitui	K80	Consortiun	31	9.33333	12.6667	0.0569667	1.8	15.65	1017.25	10.8	10.6
one	Kitui	K80	Control	34.6667	22	6.66667	0.0504333	9.83333	19.35	1257.75	11.6	9.31667
one	Kitui	M66	Native	36.6667	8.33333	7.33333	0.0314667	3	16.15	1049.75	13.6	11.45
one	Kitui	M66	Biofix	40.6667	11.3333	13.3333	0.0553	5.36667	10.35	672.75	11.4	10.4167
one	Kitui	M66	Consortiun	47.6667	16.6667	19.6667	0.1395	6.73333	26.95	1751.75	14.1	11.6
one	Kitui	M66	Control	26.6667	8.33333	3.66667	0.0115333	2	23.6	1534	11	10.0667
one	Kitui	KVU	Native	42.6667	15.6667	6	0.00522222	6.6	25.85	1680.25	12.2	12.3333
one	Kitui	KVU	Biofix	53.6667	30	29.6667	0.235967	16.1667	5.75	373.75	11	9.48333
one	Kitui	KVU	Consortiun	44.3333	21.3333	4.66667	0.0091	10.1667	23.4	1521	13.2	13.7
one	Kitui	KVU	Control	49.6667	16.6667	30.3333	0.273233	7.33333	19.95	1296.75	13.7	11.2
one	Kitui	K80	Native	35.3333	17.3333	21	0.0924	6.16667	27.55	1790.75	12.6	18.2667
one	Kitui	K80	Biofix	55.6667	22.3333	36	0.251633	13	22.7	1475.5	10	12.2667
one	Kitui	K80	Consortiun	43	19	9	0.0575	6.4	20.85	1355.25	13.9	6.8
one	Kitui	K80	Control	32.6667	12.6667	21	0.110078	4.16667	15.25	991.25	10.8	9.93333
one	Kitui	M66	Native	40.6667	14.6667	15.6667	0.0314	7.23333	18.9	1228.5	10	11.8833
one	Kitui	M66	Biofix	42.3333	15	11.3333	0.0498667	6.23333	10	650	11.2	8.41667
one	Kitui	M66	Consortiun	52.3333	22.3333	27.6667	0.105933	9.93333	6.15	399.75	12.9	13.5333
one	Kitui	M66	Control	41	15.3333	1	0.017	6.73333	35.15	2284.75	12.1	17.4333
one	Kitui	KVU	Native	45	11.6667	7.33333	0.06075	4.43333	24.4	1586	15.1	10.05
one	Kitui	KVU	Biofix	34.3333	8	5	0.0082	2.8	12.25	796.25	13	7.6
one	Kitui	KVU	Consortiun	38.3333	13.3333	12	0.0268333	5.16667	19.35	1257.75	12.9	13.3833
one	Kitui	KVU	Control	38.3333	16.6667	28	0.0682667	5.66667	10.45	679.25	12.7	18.1
one	Kitui	K80	Native	49.6667	22	6	0.0701667	6.13333	24.95	1621.75	14.5	13.0333
one	Kitui	K80	Biofix	35	16	24	0.0566	3.26667	19.2	1248	9	9.53333
one	Kitui	K80	Consortiun	28	31.3333	20	0.0478	11.8	36.55	2375.75	10.1	23.0167
one	Kitui	K80	Control	48.3333	20.6667	13	0.0285333	6.9	50.55	3285.75	9.9	29.1833
one	Kitui	M66	Native	48.6667	14	19.3333	0.1176	5.9	20.3	1319.5	11.7	8.3
one	Kitui	M66	Biofix	47	21.3333	15	0.0128667	8	7.55	490.75	10.4	7.18333
one	Kitui	M66	Consortiun	40	10	16.6667	0.0402	4.53333	18.6	1209	10.8	9.41667
one	Kitui	M66	Control	45	19.3333	4.33333	0.00773333	8.9	17.5	1137.5	10.6	8.26667
one	Kitui	KVU	Native	16	13	22	0.0236	6.1	57.6	3744	10	22.0333
one	Kitui	KVU	Biofix	43	23.6667	3.66667	0.0213333	9.6	23.85	1550.25	13.8	15.6833
one	Kitui	KVU	Consortiun	38.6667	22	16.6667	0.0337667	8.5	46.2	3003	12.6	20.6667
one	Kitui	KVU	Control	46	20	38	0.1042	4.03333	15.7	1020.5	11.9	5.66667
one	Kitui	K80	Native	44	31.3333	9.33333	0.0964333	10	10.9	708.5	7.9	15.6333
one	Kitui	K80	Biofix	35.3333	17.6667	2	0.00656667	2.3	14.8	962	11.8	10.95
one	Kitui	K80	Consortiun	45.3333	30.6667	8	0.0409333	8.7	23.5	1527.5	10.2	8.05
one	Kitui	K80	Control	44.6667	28.3333	13	0.0415	7.7	22.7	1475.5	12.6	9.4
one	Kitui	M66	Native	44.6667	6.33333	7	0.0831667	6.3	21.65	1407.25	11.1	6.75
one	Kitui	M66	Biofix	47.6667	15.6667	7	0.0662667	8.2	19.2	1248	9.3	11.5833
one	Kitui	M66	Consortiun	39.6667	16	8	0.0248667	4.66667	4.95	321.75	10.8	3.01667
one	Kitui	M66	Control	44.8	27	3.33333	0.0130667	11.8	32.8	2132	12.1	17.3167
one	Kitui	KVU	Native	39.3333	14.6667	10	0.0129	6.4	11.9	773.5	10.5	7.33333
one	Kitui	KVU	Biofix	43.3333	29.3333	9.33333	0.0888	14.3333	16.75	1088.75	13	7.83333
one	Kitui	KVU	Consortiun	36	17	1	0.0269333	4.7	18.8	1222	7.6	12.3167
one	Kitui	KVU	Control	41	21.6667	1.33333	0.0146667	5	2.05	133.25	7.9	7.2
one	Kitui	K80	Native	47	28.3333	2.66667	0.0189	8.1	14.8	962	9.1	10.1167
one	Kitui	K80	Biofix	39.3333	15	10.3333	0.0456	5.3	10.65	692.25	10.4	7.86667
one	Kitui	K80	Consortiun	50.3333	17	41	0.0210667	7.2	23.15	1504.75	10.1	10.3333
one	Kitui	K80	Control	40.3333	16.6667	20.6667	0.0165	5.2	17.6	1144	10	17.0167
one	Kitui	M66	Native	45.6667	9.66667	3	0.0215667	5.7	26	1690	11.5	14.7
one	Kitui	M66	Biofix	43.6667	15.6667	12.6667	0.0077	6.83333	23.8	1547	11.3	14.35
one	Kitui	M66	Consortiun	25.2	12	10	0.0194667	3.4	6.45	419.25	7.4	27.8167
one	Kitui	M66	Control	47.6667	11	1.66667	0.00726667	5.3	9.15	594.75	9.4	3.53333
one	Kitui	KVU	Native	25	5	14	0.182167	3.23333	3.85	250.25	8.1	2.66667
one	Kitui	KVU	Biofix	28.6667	9.33333	2	0.0219	5.85	6.9	448.5	9.6	10.15
one	Kitui	KVU	Consortiun	55	23	9.33333	0.016	10.5667	21.85	1420.25	12.3	7.6
one	Kitui	KVU	Control	39	14.3333	4.66667	0.0011	3.8	34.2	2223	13.7	20
one	Kitui	K80	Native	45.6667	29.3333	4.33333	0.1036	13.1	9.63333	626.167	9.5	17.5444
one	Kitui	K80	Biofix	42	20	4.33333	0.0271	5	14.7	955.5	11.4	27.2778
one	Kitui	K80	Consortiun	34.6667	10.3333	5	0.0173	2.3	31.0333	2017.17	10.4	30.8444
one	Kitui	K80	Control	41	17	8.33333	0.0303	3.6	23.7333	1542.67	14.9	26.3333
one	Kitui	M66	Native	47	19.3333	6.66667	0.077	6.13333	20.5667	1336.83	12.9	13.1222
one	Kitui	M66	Biofix	48.6667	17.6667	18.3333	0.2672	4.9	17.4	1131	12.9	20.7556
one	Kitui	M66	Consortiun	39.6667	17.6667	16.3333	0.1174	4.7	19.7	1280.5	10.6	38.3778
one	Kitui	M66	Control	50.3333	24.6667	23	0.089	9.83333	17.4333	1133.17	11.8	24.4
one	Kitui	KVU	Native	48.3333	40.3333	27.6667	0.1192	10.6	16.7667	1089.83	14.7	12.7111
one	Kitui	KVU	Biofix	49	25.6667	8.66667	0.0502	6.3	7.13333	463.667	12.3	16.0556
one	Kitui	KVU	Consortiun	46	24	36.3333	0.3593	8.63333	13.5333	879.667	11.4	27.4222
one	Kitui	KVU	Control	49.3333	31.3333	33	0.1681	12.1333	45.8333	2979.17	15.5	15.1444
one	Kitui	K80	Native	48.3333	19	8.33333	0.1622	3.86667	7.13333	463.667	11.1	19.7111
one	Kitui	K80	Biofix	50.3333	34.3333	16.6667	0.215	10.2667	14.1667	920.833	10.8	11.6778
one	Kitui	K80	Consortiun	47	27.3333	39	0.5288	8.06667	25.2	1638	15	26.0778
one	Kitui	K80	Control	65.3333	30	17	0.1423	5.9	38.8667	2526.33	11.7	39.3667
one	Kitui	M66	Native	43	26	10.6667	0.2701	8.83333	19.9667	1297.83	10	16.7667
one	Kitui	M66	Biofix	35.6667	17	33.3333	0.4462	3.36667	22.3333	1451.67	11.3	17.0444
one	Kitui	M66	Consortiun	61	31.6667	9.33333	0.0105	14.4333	18.7	1215.5	12	15.9778
one	Kitui	M66	Control	54	27.6667	26.6667	0.0747	15.0667	16.1333	1048.67	11.5	28.3
one	Kitui	KVU	Native	40.3333	26	11	0.0859	7.33333	25.6	1664	11.3	18.1778
one	Kitui	KVU	Biofix	43	20.6667	30	0.2902	5.43333	28.1667	1830.83	12.9	37.8556
one	Kitui	KVU	Consortiun	54	30	14.6667	0.4145	10.4667	25.2667	1642.33	13.1	23.3
one	Kitui	KVU	Control	47	19.3333	12.6667	0.066	3.8	24.7667	1609.83	14.1	34.9556
one	Kitui	K80	Native	53.6667	23.3333	8	0.0799	8	7.63333	496.167	11	10.1111
one	Kitui	K80	Biofix	54	49.3333	7.33333	0.0146	12.1	27.1	1761.5	13.7	31.8111
one	Kitui	K80	Consortiun	46	18.3333	1.33333	0.119	14.4	5.56667	361.833	10.5	16.7889
one	Kitui	K80	Control	51	33.3333	21.3333	0.2022	4.93333	17.2667	1122.33	11.8	16.4889
one	Kitui	M66	Native	42.6667	23.6667	10.6667	0.0643	7.5	31.6667	2058.33	11.4	34.4778
one	Kitui	M66	Biofix	54	14.3333	10.6667	0.0772	9.3	18.5567	1206.18	11.2	15.7444
one	Kitui	M66	Consortiun	54.6667	23.3333	17.6667	0.147933	10.6667	14.3	929.5	13.1	21
one	Kitui	M66	Control	44	17.6667	5.33333	0.0368	3.66667	12.3	799.5	11.6	9.46667
one	Kitui	KVU	Native	39	20	21.3333	0.2363	5.13333	26.1	1696.5	13	28.6444
one	Kitui	KVU	Biofix	41	19.6667	10	0.0443	4.8	13.5	877.5	14.4	17.2778
one	Kitui	KVU	Consortiun	39	8	10	0.264	2.06667	29.2333	1900.17	15.8	24.9556
one	Kitui	KVU	Control	46.3333	22.3333	3	0.0061	1.73333	26.2	1703	14.8	18.3667
Two	Tharaka Nithi	K80	Native	36	15	18	0.0425	4.5	12.2333	795.167	10.2	11.8
Two	Tharaka Nithi	K80	Biofix	53	39	12	0.0256	8	20.2667	1317.33	11.4	20.6
Two	Tharaka Nithi	K80	Consortiun	48.7	23	11	0.0272	7.7	11.3	734.5	12	21.1
Two	Tharaka Nithi	K80	Control	70	40	20	0.0562	15.7	12.4667	810.333	10.9	11.8333
Two	Tharaka Nithi	M66	Native	40	19	3	0.0026	10.4	21.7333	1412.67	14.2	25.4667
Two	Tharaka Nithi	M66	Biofix	44	22	6	0.0146	10	8	520	12.1	8.1
Two	Tharaka Nithi	M66	Consortiun	49.1	16	12	0.0214	17.8	14.3667	933.833	13.4	12.6333
Two	Tharaka Nithi	M66	Control	34	23	8	0.0149	14.7	26.3667	1713.83	11	21.1
Two	Tharaka Nithi	KVU	Native	79.7	38	8	0.0247	13.7	36.4667	2370.33	12.9	10.5333
Two	Tharaka Nithi	KVU	Biofix	10.8	9	11	0.0258	7.9	8.8	572	12.5	6.03333
Two	Tharaka Nithi	KVU	Consortiun	53.7	37	8	0.0151	13	11.6333	756.167	9	13.3
Two	Tharaka Nithi	KVU	Control	51	28	1	0.0011	6.5	12.3667	803.833	12.3	36.6
Two	Tharaka Nithi	K80	Native	32.3	6	9	0.0259	1.2	32.4667	2110.33	12.3	16.5
Two	Tharaka Nithi	K80	Biofix	45	16	10	0.0304	7.5	8.7	565.5	9.8	10.3333
Two	Tharaka Nithi	K80	Consortiun	34	6	1	0.011	2.3	10.3	669.5	11.2	14.9667
Two	Tharaka Nithi	K80	Control	51.7	25	18	0.051	11.6	19.3	1254.5	11.9	24.0333
Two	Tharaka Nithi	M66	Native	55	15	10	0.0624	6.7	20.0667	1304.33	12	15.4333
Two	Tharaka Nithi	M66	Biofix	44	18	4	0.0083	4.8	23.1333	1503.67	11.2	21.9333
Two	Tharaka Nithi	M66	Consortiun	39	19	18	0.05	7.3	10.1	656.5	12.3	10.8333
Two	Tharaka Nithi	M66	Control	30.3	8	3	0.01	2	23.7333	1542.67	12.1	17.3667
Two	Tharaka Nithi	KVU	Native	37.3	12	2	0.0052	7.5	13.1333	853.667	11.6	9.73333
Two	Tharaka Nithi	KVU	Biofix	47	37	3	0.0111	10.3	23.6667	1538.33	11.8	32.9
Two	Tharaka Nithi	KVU	Consortiun	38.3	9	2	0.0117	3.1	10.7	695.5	8.7	21
Two	Tharaka Nithi	KVU	Control	47.3	29	13	0.0831	12.9	23.3667	1518.83	13.4	18
Two	Tharaka Nithi	K80	Native	53	21	6	0.0121	9.6	19.7333	1282.67	11.5	34.9333
Two	Tharaka Nithi	K80	Biofix	35.7	6	6	0.0096	2	11.3	734.5	12.5	23.1667
Two	Tharaka Nithi	K80	Consortiun	46.7	17	9	0.0088	7.4	21.1667	1375.83	12.2	16.1333
Two	Tharaka Nithi	K80	Control	37	23	10	0.0269	5.2	23.0333	1497.17	10.9	25.2667
Two	Tharaka Nithi	M66	Native	40.7	19	10	0.0314	12.5	17.5333	1139.67	12.1	16.6667
Two	Tharaka Nithi	M66	Biofix	47	13	20	0.0568	7.7	14.0333	912.167	12.2	11.8
Two	Tharaka Nithi	M66	Consortiun	29.7	5	5	0.0132	2.1	3.13333	203.667	11.6	2.8
Two	Tharaka Nithi	M66	Control	45	24	1	0.0022	9.5	22.6333	1471.17	11.9	28
Two	Tharaka Nithi	KVU	Native	40.3	6	14	0.0332	2.6	3.86667	251.333	11.4	3.26667
Two	Tharaka Nithi	KVU	Biofix	35.6	11	3	0.0053	3.3	11.6	754	10.5	13.3
Two	Tharaka Nithi	KVU	Consortiun	40.7	17	19	0.0637	6.3	20.6333	1341.17	11.4	22.1333
Two	Tharaka Nithi	KVU	Control	37.7	13	8	0.0374	5.7	5.6	364	12	6.16667
Two	Tharaka Nithi	K80	Native	44.6	24	2	0.0044	5	57.3667	3728.83	13	51.2333
Two	Tharaka Nithi	K80	Biofix	39.3	13	4	0.0079	4.6	13.1333	853.667	9.9	10.8667
Two	Tharaka Nithi	K80	Consortiun	56.5	28	22	0.0659	9.7	24.4	1586	11.1	30.0667
Two	Tharaka Nithi	K80	Control	42.5	14	7	0.0173	4.2	18.7	1215.5	11.5	21.1
Two	Tharaka Nithi	M66	Native	42.7	14	12	0.0314	4.9	7.1	461.5	12.7	4.86667
Two	Tharaka Nithi	M66	Biofix	40.6	19	8	0.0347	6.1	21.9667	1427.83	10.2	29.2333
Two	Tharaka Nithi	M66	Consortiun	46.1	19	4	0.0196	4.6	19.9667	1297.83	11.3	13.7667
Two	Tharaka Nithi	M66	Control	49.6	20	4	0.011	6.7	16.2667	1057.33	12.5	17.4667
Two	Tharaka Nithi	KVU	Native	39.7	13	14	0.0487	4.1	23.1333	1503.67	12.2	18.7667
Two	Tharaka Nithi	KVU	Biofix	42.7	17	4	0.0245	6.2	10.6	689	10.6	11.3
Two	Tharaka Nithi	KVU	Consortiun	53.6	21	9	0.0446	8.6	18.9667	1232.83	12.2	18
Two	Tharaka Nithi	KVU	Control	38.3	13	8	0.0084	3.2	7.13333	463.667	10.3	9.5
Two	Tharaka Nithi	K80	Native	45.3	19	13	0.0588	10.7	38.5667	2506.83	13.7	46.9
Two	Tharaka Nithi	K80	Biofix	44.7	17	15	0.0714	5.2	21.2333	1380.17	11	20.6667
Two	Tharaka Nithi	K80	Consortiun	42.7	17	20	0.0587	6.2	26.0667	1694.33	11.9	25.1667
Two	Tharaka Nithi	K80	Control	51.3	23	5	0.0233	6.9	20.3	1319.5	14	17.4
Two	Tharaka Nithi	M66	Native	38.7	14	4	0.0204	4.9	20.0333	1302.17	12.2	26.1667
Two	Tharaka Nithi	M66	Biofix	49	11	6	0.025	4.8	34.6333	2251.17	12	20.7333
Two	Tharaka Nithi	M66	Consortiun	44	28	5	0.0151	7.9	19.1333	1243.67	11.5	11.8667
Two	Tharaka Nithi	M66	Control	43.3	18	6	0.0276	6.9	26.6667	1733.33	12.3	28.0667
Two	Tharaka Nithi	KVU	Native	47.3	26	3	0.0146	6.5	15.3	994.5	10.5	14.1667
Two	Tharaka Nithi	KVU	Biofix	48.3	17	18	0.0636	8.4	29.1667	1895.83	15.6	36.1333
Two	Tharaka Nithi	KVU	Consortiun	47.5	27	6	0.0416	11	40.4667	2630.33	10.9	46.4
Two	Tharaka Nithi	KVU	Control	53.3	22	9	0.0133	9.5	20.2	1313	11.8	22.0667
Two	Tharaka Nithi	K80	Native	35.3	20	4	0.0094	7.8	25.4	1651	11.8	23.6333
Two	Tharaka Nithi	K80	Biofix	42	30	14	0.0589	10.6	47.5	3087.5	14.1	31.3667
Two	Tharaka Nithi	K80	Consortiun	51	27	16	0.0756	10.3	14.9333	970.667	13.6	14.3333
Two	Tharaka Nithi	K80	Control	43	20	13	0.0384	11.1	20.9667	1362.83	9.5	26.0667
Two	Tharaka Nithi	M66	Native	49.3	25	18	0.0744	6.5	26.6333	1731.17	13.9	22.6333
Two	Tharaka Nithi	M66	Biofix	39.6	14	14	0.0427	5	11.3	734.5	11.7	8.26667
Two	Tharaka Nithi	M66	Consortiun	38	17	16	0.0627	6.4	18.9333	1230.67	12.2	15.1667
Two	Tharaka Nithi	M66	Control	43.6	26	14	0.0628	10.7	26.4667	1720.33	12.3	26.1667
Two	Tharaka Nithi	KVU	Native	45.7	23	6	0.0107	3.6	11.6333	756.167	10.5	14.1667
Two	Tharaka Nithi	KVU	Biofix	62.7	27	25	0.156	14.4	14.6333	951.167	15.2	11.2
Two	Tharaka Nithi	KVU	Consortiun	47.3	24	11	0.0581	9.5	16.9667	1102.83	12.2	16.4
Two	Tharaka Nithi	KVU	Control	44.3	19	18	0.0843	9	13.9333	905.667	15.9	13.8
Two	Tharaka Nithi	K80	Native	43.3	29	10	0.0148	10.3	12.7333	827.667	10.1	19.2333
Two	Tharaka Nithi	K80	Biofix	51.3	14	9	0.0194	5.5	5.66667	368.333	11.6	23.5
Two	Tharaka Nithi	K80	Consortiun	41.3	19	5	0.0054	5.9	4.13333	268.667	14.3	0
Two	Tharaka Nithi	K80	Control	56.5	17	10	0.0284	7.2	19.6	1274	11.4	20.6
Two	Tharaka Nithi	M66	Native	50	14	3	0.0098	7.1	15.2	988	13.5	29.3667
Two	Tharaka Nithi	M66	Biofix	44.7	16	3	0.0044	8.1	13.9	903.5	12.8	19.5333
Two	Tharaka Nithi	M66	Consortiun	57	19	3	0.0091	9.3	16.4667	1070.33	13.1	13.8
Two	Tharaka Nithi	M66	Control	50	24	11	0.0156	11.5	11.2667	732.333	12.7	14.0333
Two	Tharaka Nithi	KVU	Native	43	9	4	0.0069	3.7	39.2667	2552.33	15.9	31.9333
Two	Tharaka Nithi	KVU	Biofix	42	25	4	0.0033	7.3	8	520	12.5	8
Two	Tharaka Nithi	KVU	Consortiun	44.3	14	7	0.0088	4.3	8.63333	561.167	9.5	14.5333
Two	Tharaka Nithi	KVU	Control	46	21	3	0.0022	8.6	6.13333	398.667	12.5	5.2
Two	Tharaka Nithi	K80	Native	41	23	10	0.0313	7	16.6667	1083.33	11.4	16.2333
Two	Tharaka Nithi	K80	Biofix	62.7	40	22	0.0573	19	46.4	3016	12.1	50.8
Two	Tharaka Nithi	K80	Consortiun	51.3	28	11	0.0073	4.6	16.6333	1081.17	12.6	21.5333
Two	Tharaka Nithi	K80	Control	58.7	37	11	0.0148	14.8	29.9	1943.5	10.8	35.2333
Two	Tharaka Nithi	M66	Native	42.3	13	3	0.0012	7.5	12.1333	788.667	13.1	10.0333
Two	Tharaka Nithi	M66	Biofix	71.7	28	13	0.0217	21	16.4667	1070.33	15.1	29.8333
Two	Tharaka Nithi	M66	Consortiun	36.3	14	5	0.0085	9.5	5.93333	385.667	12.8	9.9
Two	Tharaka Nithi	M66	Control	69.3	20	15	0.0307	14.8	18.9333	1230.67	14.3	33.9
Two	Tharaka Nithi	KVU	Native	85.8	24	24	0.0434	13.1	11.4333	743.167	14	14.5667
Two	Tharaka Nithi	KVU	Biofix	59.3	25	20	0.0525	9.8	21.4333	1393.17	11.1	31.7
Two	Tharaka Nithi	KVU	Consortiun	88.7	58	19	0.0529	27.4	25.8667	1681.33	15	25.4
Two	Tharaka Nithi	KVU	Control	41.3	19	12	0.0172	16.8	15	975	16.6	22.3
Two	Tharaka Nithi	K80	Native	57.8	27	44	0.0461	11.2	20.5	1332.5	13.3	30.6
Two	Tharaka Nithi	K80	Biofix	47.8	18	7	0.0082	7.6	10.9333	710.667	12.8	10.2333
Two	Tharaka Nithi	K80	Consortiun	44	11	8	0.0264	3.9	4.93333	320.667	11.1	10.3
Two	Tharaka Nithi	K80	Control	69	27	31	0.1055	12.5	18.8	1222	11.9	18.2667
Two	Tharaka Nithi	M66	Native	33.3	8	1	0.0017	20	9.3	604.5	14.3	22.6667
Two	Tharaka Nithi	M66	Biofix	81.3	25	18	0.0476	20.1	23.3	1514.5	12.9	25.8333
Two	Tharaka Nithi	M66	Consortiun	58	20	8	0.0171	11.7	19.1	1241.5	12.8	17.5333
Two	Tharaka Nithi	M66	Control	48.3	15	20	0.037	7.6	8.8	572	14.3	10.3333
Two	Tharaka Nithi	KVU	Native	117.7	48	63	0.1061	37.8	13.1333	853.667	15.8	11.8333
Two	Tharaka Nithi	KVU	Biofix	13.7	8	10	0.0211	2	8.8	572	15.6	8.16667
Two	Tharaka Nithi	KVU	Consortiun	65	28	4	0.0102	12.7	31.5667	2051.83	16.1	32.7
Two	Tharaka Nithi	KVU	Control	33	10	19	0.0235	2.4	9.8	637	14.1	11.7667
Two	Tharaka Nithi	K80	Native	48.3	19	17	0.0252	3.8	30.3	1969.5	12.6	28.1
Two	Tharaka Nithi	K80	Biofix	62.7	42	14	0.0316	9.9	14.1667	920.833	9.1	15.8
Two	Tharaka Nithi	K80	Consortiun	64	42	18	0.045	12.6	12.6333	821.167	11.1	12.8667
Two	Tharaka Nithi	K80	Control	41.1	13	28	0.095	3.7	25.0333	1627.17	12.4	25.5
Two	Tharaka Nithi	M66	Native	83	28	23	0.0496	12.4	22.1667	1440.83	11.7	17.5
Two	Tharaka Nithi	M66	Biofix	42.7	10	4	0.0057	3.1	23.3667	1518.83	11.1	22.0333
Two	Tharaka Nithi	M66	Consortiun	53	37	27	0.0234	7.2	24.6	1599	11.6	15.5
Two	Tharaka Nithi	M66	Control	67.7	33	32	0.0778	15.2	53.8	3497	12.9	40.0667
Two	Tharaka Nithi	KVU	Native	66.5	37	18	0.0441	13.4	27.4667	1785.33	12.4	23.7
Two	Tharaka Nithi	KVU	Biofix	65.3	51	8	0.037	16.9	16.8667	1096.33	12.9	15.8
Two	Tharaka Nithi	KVU	Consortiun	46.1	22	27	0.0978	5.5	11.6333	756.167	10.8	12.3
Two	Tharaka Nithi	KVU	Control	74.3	40	24	0.0691	11.1	26.8667	1746.33	14	26.4667
Two	Tharaka Nithi	K80	Native	73	27	17	0.0468	15.2	32.4667	2110.33	12.3	30.9333
Two	Tharaka Nithi	K80	Biofix	76.3	48	24	0.0874	13.7	16.5333	1074.67	10.1	19.3667
Two	Tharaka Nithi	K80	Consortiun	43	25	32	0.0604	5.9	27.6	1794	14.3	19.2667
Two	Tharaka Nithi	K80	Control	62.3	47	6	0.0158	5	20.9667	1362.83	12.4	17.2333
Two	Tharaka Nithi	M66	Native	55	33	28	0.0543	11.9	24.3	1579.5	11.2	18.9
Two	Tharaka Nithi	M66	Biofix	51.7	45	19	0.026	5.4	18.7	1215.5	12.8	17.1
Two	Tharaka Nithi	M66	Consortiun	78.7	38	13	0.0177	8	14.6	949	12.1	10.6667
Two	Tharaka Nithi	M66	Control	41	19	14	0.0313	10.8	19.3667	1258.83	13.6	18.8667
Two	Tharaka Nithi	KVU	Native	62	43	19	0.0481	5.3	86.4667	5620.33	14.8	67.2
Two	Tharaka Nithi	KVU	Biofix	79.3	39	14	0.0227	4.9	21.9667	1427.83	13.4	20.3667
Two	Tharaka Nithi	KVU	Consortiun	42.7	24	18	0.0544	9.9	18.7	1215.5	13.3	18.5333
Two	Tharaka Nithi	KVU	Control	47.7	30	33	0.0681	18.5	29.8	1937	13.4	24.5667
Two	Tharaka Nithi	K80	Native	74	31	12	0.0295	5.8	17.0667	1109.33	11.5	20.9333
Two	Tharaka Nithi	K80	Biofix	66	38	16	0.0469	7.8	34.9667	2272.83	12.6	31.4333
Two	Tharaka Nithi	K80	Consortiun	44	20	8	0.0163	2.7	20.6	1339	10.3	25.4667
Two	Tharaka Nithi	K80	Control	46.3	18	9	0.0321	1.2	23.1333	1503.67	11.5	17.8667
Two	Tharaka Nithi	M66	Native	61	24	21	0.0365	4.6	20.7	1345.5	12.3	15.7667
Two	Tharaka Nithi	M66	Biofix	117.3	53	10	0.0283	18.2	20.4333	1328.17	11.2	21.2667
Two	Tharaka Nithi	M66	Consortiun	58.7	19	11	0.0222	7.2	12.7333	827.667	14.4	12.5
Two	Tharaka Nithi	M66	Control	41.7	11	4	0.0071	0.1	18.5333	1204.67	12.5	22.5667
Two	Tharaka Nithi	KVU	Native	96.3	26	19	0.03	9.4	27.0667	1759.33	12.5	25.9333
Two	Tharaka Nithi	KVU	Biofix	66.7	28	7	0.0116	3	26.5667	1726.83	15.6	24.5667
Two	Tharaka Nithi	KVU	Consortiun	61.7	39	9	0.0241	10.6	16.6	1079	12.7	16.6
Two	Tharaka Nithi	KVU	Control	88.3	31	29	0.0958	5.3	17.8333	1159.17	11.6	16.9667
Two	Tharaka Nithi	K80	Native	46.7	28	9	0.0197	19.3	13.3667	868.833	10.4	9.73333
Two	Tharaka Nithi	K80	Biofix	57.7	30	22	0.0423	12.2	18.2667	1187.33	12.8	12.0667
Two	Tharaka Nithi	K80	Consortiun	55	23	10	0.0188	11.1	12.4	806	10.1	6.06667
Two	Tharaka Nithi	K80	Control	47	26	12	0.0251	12.3	21	1365	10.1	12.7
Two	Tharaka Nithi	M66	Native	54	26	23	0.0683	16.8	28.0333	1822.17	13.3	30.5333
Two	Tharaka Nithi	M66	Biofix	59.3	38	10	0.0207	7.9	14.7	955.5	12.2	7.1
Two	Tharaka Nithi	M66	Consortiun	54	23	6	0.0126	14.3	13.4667	875.333	12.5	6.1
Two	Tharaka Nithi	M66	Control	55	16	3	0.005	11	30.7	1995.5	12.4	19.2333
Two	Tharaka Nithi	KVU	Native	49	38	12	0.0146	16.4	29.5333	1919.67	11.8	10.8
Two	Tharaka Nithi	KVU	Biofix	50	29	6	0.015	16.2	22.6	1469	12.4	13.4667
Two	Tharaka Nithi	KVU	Consortiun	42	17	4	0.006	6.6	16.6333	1081.17	10.7	26.4
Two	Tharaka Nithi	KVU	Control	73.3	35	12	0.0507	23.3	21.8667	1421.33	12.9	11.8667
Two	Tharaka Nithi	K80	Native	60.3	28	21	0.105	12.6	27.7	1800.5	11.3	24.0333
Two	Tharaka Nithi	K80	Biofix	64	47	15	0.0677	16.4	18.3	1189.5	11.9	10.5333
Two	Tharaka Nithi	K80	Consortiun	53.3	20	16	0.0396	16.4	30.4667	1980.33	13.3	23.6
Two	Tharaka Nithi	K80	Control	51.3	29	10	0.0262	16.7	16.6	1079	11.2	8.16667
Two	Tharaka Nithi	M66	Native	69	23	6	0.0081	12	27.8	1807	11.5	14.3333
Two	Tharaka Nithi	M66	Biofix	82	33	14	0.0253	16.2	23	1495	13.1	10.6
Two	Tharaka Nithi	M66	Consortiun	53	21	4	0.0132	13.2	18.5667	1206.83	13.5	10.6667
Two	Tharaka Nithi	M66	Control	51	20	15	0.03	12.9	27.6333	1796.17	11.1	13.0667
Two	Tharaka Nithi	KVU	Native	63.3	37	12	0.1138	18.4	17.6333	1146.17	12.4	10.3667
Two	Tharaka Nithi	KVU	Biofix	64.7	25	27	0.0771	14.7	11.9333	775.667	11.4	6.03333
Two	Tharaka Nithi	KVU	Consortiun	61	29	31	0.1084	14.5	32.2667	2097.33	12.8	12.8333
Two	Tharaka Nithi	KVU	Control	54	14	13	0.0272	10.1	23.9333	1555.67	11.6	15.9667
Two	Tharaka Nithi	K80	Native	60	38	18	0.1015	14.3	37.2	2418	10.7	26.2667
Two	Tharaka Nithi	K80	Biofix	57.3	33	6	0.0262	10.4	36.8667	2396.33	12.8	19.2333
Two	Tharaka Nithi	K80	Consortiun	55.6	29	21	0.0794	12.2	31.3667	2038.83	11.8	20.0667
Two	Tharaka Nithi	K80	Control	63.3	31	17	0.039	8.5	21.7	1410.5	11	18.1667
Two	Tharaka Nithi	M66	Native	63	27	27	0.0433	17.8	12.0333	782.167	11	4.16667
Two	Tharaka Nithi	M66	Biofix	59.7	31	11	0.0411	11.7	29.8	1937	11.9	15.4333
Two	Tharaka Nithi	M66	Consortiun	48.7	13	15	0.0627	10.7	20.8333	1354.17	12	12.7
Two	Tharaka Nithi	M66	Control	54	20	10	0.0249	13.9	9.2	598	10.5	3.16667
Two	Tharaka Nithi	KVU	Native	62.7	24	16	0.0317	14.2	26.2	1703	11.4	16.7667
Two	Tharaka Nithi	KVU	Biofix	69	37	9	0.0339	20	69.8	4537	15.9	21.1667
Two	Tharaka Nithi	KVU	Consortiun	36	30	1	0.0012	10.7	14.3	929.5	11.1	7.1
Two	Tharaka Nithi	KVU	Control	53.7	32	31	0.1006	15.8	36.3667	2363.83	13.9	17.4667
Two	Embu	K80	Native	36	11	19.3333	0.0407333	7.06667	34.0667	2214.33	13.4	41.2333
Two	Embu	K80	Biofix	41.7	11	30.3333	0.0374	5.03333	33.6333	2186.17	12.2	37.6667
Two	Embu	K80	Consortiun	50	22	21.3333	0.0598	13.9667	39.1	2541.5	12.2	51.3333
Two	Embu	K80	Control	43.3	16	13.3333	0.0199	4.4	18.5667	1206.83	11.4	28.6333
Two	Embu	M66	Native	42	10	11	0.0464	19.3	33.1	2151.5	11.7	37.2667
Two	Embu	M66	Biofix	51.3	17	12	0.0487667	8	38.1667	2480.83	12.5	29.6667
Two	Embu	M66	Consortiun	47.3	14	16	0.0790667	11.7	34.2	2223	13.8	37.4667
Two	Embu	M66	Control	53.3	17	11	0.0207	5	23.5667	1531.83	12.4	16.3
Two	Embu	KVU	Native	46.7	14	5.66667	0.0113333	14.3	37.6333	2446.17	14.5	29.1
Two	Embu	KVU	Biofix	69	21	23.3333	0.043	13.3667	67.7667	4404.83	14.8	58.8333
Two	Embu	KVU	Consortiun	47	14	14	0.0616333	12.3333	55.1667	3585.83	13.2	48.2667
Two	Embu	KVU	Control	58.7	23	40.3333	0.0482333	9	29.7667	1934.83	15	26.2333
Two	Embu	K80	Native	47.3	15	6.33333	0.00586667	11.5	30.9333	2010.67	13.6	30.3333
Two	Embu	K80	Biofix	50.7	15	23.6667	0.0492667	3.33333	18.0333	1172.17	11.8	20.5667
Two	Embu	K80	Consortiun	34	14	16	0.0759	9	51.1333	3323.67	12.5	54.2667
Two	Embu	K80	Control	47	13	0	0	3.4	15.9667	1037.83	12	27.0333
Two	Embu	M66	Native	55.3	15	5.33333	0.0118667	9.96667	31.7333	2062.67	13	29.5667
Two	Embu	M66	Biofix	42.7	10	8	0.0153	3.5	41	2665	12	36.4
Two	Embu	M66	Consortiun	51	10	7.66667	0.0247	9.53333	33.8333	2199.17	11.5	28.2
Two	Embu	M66	Control	62.3	20	22	0.0305667	3.63333	32.3	2099.5	12	26.5
Two	Embu	KVU	Native	61.3	13	14.3333	0.0366	11.1667	34.1667	2220.83	15.5	29.2667
Two	Embu	KVU	Biofix	45.7	16	28	0.0838333	6.8	24.5	1592.5	14.9	28.6667
Two	Embu	KVU	Consortiun	35	7	11.6667	0.0618667	15.8333	46.6333	3031.17	17	47.7667
Two	Embu	KVU	Control	40.7	11	0	0	4	14.2667	927.333	12.5	20.3333
Two	Embu	K80	Native	40.3	17	21.6667	0.0874	8.6	31.6	2054	9.8	32.0667
Two	Embu	K80	Biofix	58.7	24	15.3333	0.0703667	10.8	26.5333	1724.67	11.6	27.0667
Two	Embu	K80	Consortiun	48.3	20	9	0.0826	9.53333	36.1667	2350.83	12.4	34.5667
Two	Embu	K80	Control	47	15	5.66667	0.0143667	0.5	22.9	1488.5	12.4	25.9667
Two	Embu	M66	Native	42	11	7	0.0270333	10.9667	22.7333	1477.67	15.3	27.4667
Two	Embu	M66	Biofix	42.3	13	8.66667	0.0282667	7	24.8	1612	13.8	27.4667
Two	Embu	M66	Consortiun	61.7	13	15	0.0687	8.73333	17	1105	11.4	35.0333
Two	Embu	M66	Control	44.3	15	9	0.0214333	6.86667	15.6667	1018.33	13.6	27.6333
Two	Embu	KVU	Native	71	14	20.6667	0.0453333	10.2	31.5667	2051.83	13.5	36.6333
Two	Embu	KVU	Biofix	42.3	13	13.6667	0.0241667	6.2	43.7	2840.5	15.4	43.2333
Two	Embu	KVU	Consortiun	50.7	20	16	0.0338	11.2667	36.6	2379	13.5	46.1667
Two	Embu	KVU	Control	58.3	20	22.3333	0.0399667	6.8	28.1	1826.5	15.1	23.5667
Two	Embu	K80	Native	51	22	8	0.0653667	9.76667	10.7333	697.667	10.2	33.7667
Two	Embu	K80	Biofix	40.3	7	7	0.0278667	2.06667	4.2	273	10.7	6.36667
Two	Embu	K80	Consortiun	55.7	11	9.66667	0.0698333	8.5	10.4333	678.167	12.2	35.4333
Two	Embu	K80	Control	35.6	6	2	0.00986667	2.2	3.76667	244.833	12.1	15.8
Two	Embu	M66	Native	41	12	9.66667	0.0647	7.1	3.7	240.5	12.2	4.6
Two	Embu	M66	Biofix	33.7	17	12.6667	0.0876667	7.7	4.56667	296.833	14	27.9333
Two	Embu	M66	Consortiun	39	11	9.66667	0.066	9.63333	14.0667	914.333	12.6	10.0667
Two	Embu	M66	Control	45.7	8	7.66667	0.0267333	3.8	10.1667	660.833	12.7	9.03333
Two	Embu	KVU	Native	41.3	6	14	0.0651	5	10.9	708.5	13.9	28.2
Two	Embu	KVU	Biofix	55.7	10	13.6667	0.0281667	7.03333	21.6333	1406.17	15	29.9667
Two	Embu	KVU	Consortiun	42	9	10	0.0240667	3.6	25.4667	1655.33	17.3	27.3333
Two	Embu	KVU	Control	48.3	10	19.3333	0.0405333	2.2	9.73333	632.667	15.4	14.3667
Two	Embu	K80	Native	67	18	18	0.0882333	12.6667	7.23333	470.167	11.6	36.0667
Two	Embu	K80	Biofix	45	15	7.33333	0.0256667	4.5	4.93333	320.667	11.6	34.8667
Two	Embu	K80	Consortiun	58	18	12	0.0921667	9.56667	18.8	1222	12.8	39.3333
Two	Embu	K80	Control	62.3	19	7	0.0249667	3.6	3.53333	229.667	11	22.3
Two	Embu	M66	Native	54	17	14	0.0588667	6.6	19.6333	1276.17	14.3	22.5667
Two	Embu	M66	Biofix	42.3	14	5	0.0311667	3.16667	14.4	936	13.5	11.5667
Two	Embu	M66	Consortiun	46.7	10	6.33333	0.0386667	4.36667	10.3	669.5	13.6	23.4667
Two	Embu	M66	Control	61.3	12	10	0.0188667	2.5	11.0333	717.167	11.6	11.0667
Two	Embu	KVU	Native	56.3	14	17	0.0589333	13.8667	15.1667	985.833	16.4	19.6
Two	Embu	KVU	Biofix	46.3	9	4	0.0208333	5.03333	14.0667	914.333	14.1	14.7
Two	Embu	KVU	Consortiun	52.7	19	20.3333	0.831333	7.36667	20.4333	1328.17	15.2	24.8667
Two	Embu	KVU	Control	52.3	17	17.6667	0.0347333	7.5	15	975	14.1	16.4
Two	Embu	K80	Native	62	22	17.6667	0.0737	8.5	10.3667	673.833	11.3	40.9333
Two	Embu	K80	Biofix	46.7	12	18.6667	0.105233	4.53333	4.9	318.5	11.1	24.9667
Two	Embu	K80	Consortiun	45.7	24	12	0.0503	2.7	17.9	1163.5	11.7	35
Two	Embu	K80	Control	50.7	20	11	0.0285	4.06667	15.2667	992.333	11.9	23.5
Two	Embu	M66	Native	62	9	8	0.0373	12.1667	20.5333	1334.67	13.9	22.4333
Two	Embu	M66	Biofix	72	17	13.6667	0.0472333	11.1667	22.1	1436.5	13.7	26.2333
Two	Embu	M66	Consortiun	41.3	7	14.3333	0.0843333	7.23333	24.7	1605.5	13.9	26.8
Two	Embu	M66	Control	55.3	13	7	0.0244333	5.23333	8.9	578.5	15.4	7.3
Two	Embu	KVU	Native	53	7	14.3333	0.0598	9.9	14.0667	914.333	13.4	30.3
Two	Embu	KVU	Biofix	51.3	9	16.6667	0.0659667	6.43333	3.56667	231.833	14.3	11.0333
Two	Embu	KVU	Consortiun	68	19	17	0.0789667	9.5	19.6	1274	15.3	28.6667
Two	Embu	KVU	Control	44.7	20	11.3333	0.0240667	6.56667	7.7	500.5	12.6	23.6
Two	Embu	K80	Native	46	27	14.6667	0.147933	16.8667	22	1430	12.4	53.5333
Two	Embu	K80	Biofix	59.3	31	18.3333	0.0949667	13.6	21.6	1404	11.5	80.2333
Two	Embu	K80	Consortiun	17.7	39	32.3333	0.1252	19.2667	20.5	1332.5	8.8	33.7333
Two	Embu	K80	Control	52.3	31	18.6667	0.0606667	10.9667	6	390	11.6	46.8667
Two	Embu	M66	Native	48.7	18	16.6667	0.0475	10.1667	31.2333	2030.17	14.2	73.3667
Two	Embu	M66	Biofix	43.2	14	19.6667	0.0566333	6.36667	6.53333	424.667	14.3	48.5667
Two	Embu	M66	Consortiun	44.3	17	13.6667	0.0318667	8.03333	16.8	1092	12.8	77
Two	Embu	M66	Control	89.6	30	23.6667	0.0739	4.76667	2.13333	138.667	10	59.6
Two	Embu	KVU	Native	48	22	27.6667	0.134333	12.5	26	1690	16.6	90.7667
Two	Embu	KVU	Biofix	62	26	50.3333	0.2068	17.0333	6.26667	407.333	12.2	81.2333
Two	Embu	KVU	Consortiun	50	21	24.3333	0.0738667	9.6	10.3	669.5	13.8	62.3667
Two	Embu	KVU	Control	47	14	10.3333	0.0213667	6.36667	12.3333	801.667	17.7	39.3333
Two	Embu	K80	Native	74	29	26	0.0898333	23	10.9	708.5	9.3	55.4
Two	Embu	K80	Biofix	68.3	29	31	0.1547	14.6	6.1	396.5	13.2	30.2333
Two	Embu	K80	Consortiun	69.7	21	13.3333	0.0652667	16.6667	12.9333	840.667	12.5	61.6667
Two	Embu	K80	Control	51	23	24	0.0525667	10.1667	6.03333	392.167	12.8	36.5
Two	Embu	M66	Native	50.3	15	13.6667	0.0806333	12.2667	11.5667	751.833	13.2	40.9333
Two	Embu	M66	Biofix	55	16	20.3333	0.1119	20.9667	3	195	11.8	49.3
Two	Embu	M66	Consortiun	60.3	19	13	0.0348667	15.6667	9.56667	621.833	13.9	49.4667
Two	Embu	M66	Control	76.7	32	19.6667	0.0316333	8.7	5.16667	335.833	11.8	33.5667
Two	Embu	KVU	Native	64.3	28	24.3333	0.0871	11.1	4.4	286	14.8	48.6
Two	Embu	KVU	Biofix	77	39	34.6667	0.0980333	18.8333	9.33333	606.667	18.8	36.4333
Two	Embu	KVU	Consortiun	60.3	30	41.3333	0.0751333	9.7	12.8	832	13.6	39.1
Two	Embu	KVU	Control	56	34	11	0.0249667	9.9	12.3667	803.833	16.5	32.7667
Two	Embu	K80	Native	53.7	15	22	0.0781333	16.7667	3.96667	257.833	0	25.5
Two	Embu	K80	Biofix	51	14	20	0.0903333	18.6333	6.8	442	13.1	27.5333
Two	Embu	K80	Consortiun	67.7	34	35.6667	0.198933	22.3667	5.66667	368.333	11.8	35.4333
Two	Embu	K80	Control	52	13	14	0.0411	4.63333	0	0	12.4	22.7667
Two	Embu	M66	Native	51.7	15	22.6667	0.103667	8.56667	3.7	240.5	11.8	17.4
Two	Embu	M66	Biofix	60.7	15	11.3333	0.0327	16.6667	1.83333	119.167	14	17.6667
Two	Embu	M66	Consortiun	51.3	13	21.6667	0.0772	14.6333	1.56667	101.833	8.9	23.8
Two	Embu	M66	Control	43	13	17.6667	0.0439	5.86667	2.06667	134.333	14.4	18.4667
Two	Embu	KVU	Native	51.3	10	18.3333	0.113667	19.5	14.2	923	14.8	33.5667
Two	Embu	KVU	Biofix	53	23	16.3333	0.137367	15.3	16.2333	1055.17	17	66.4
Two	Embu	KVU	Consortiun	60.3	15	14	0.0978	6.63333	12.5333	814.667	12.8	41
Two	Embu	KVU	Control	63	26	25	0.0873667	7.86667	10.2	663	17.1	37.2333
Two	Embu	K80	Native	31	8	29	0.112367	8.3	2.13333	138.667	10.8	38.6667
Two	Embu	K80	Biofix	37	10	12.6667	0.0626333	13.4	0.833333	54.1667	6.9	38
Two	Embu	K80	Consortiun	53	22	24	0.075	9.9	2.63333	171.167	6.1	57.8333
Two	Embu	K80	Control	46.3	19	17	0.0627667	3.5	0.4	26	8.7	39.0667
Two	Embu	M66	Native	37.7	15	20.6667	0.0545	9.66667	0.466667	30.3333	9.3	27.2
Two	Embu	M66	Biofix	35	9	9.33333	0.0458333	3.83333	0.366667	23.8333	5.8	12.2333
Two	Embu	M66	Consortiun	61.3	23	22	0.0717667	14.4333	0.533333	34.6667	7	23.5333
Two	Embu	M66	Control	43.7	18	10	0.0221667	6.36667	0.4	26	11.3	22.9
Two	Embu	KVU	Native	46.3	21	20	0.0603	11.8667	0.2	13	6.7	52.2333
Two	Embu	KVU	Biofix	44	19	44.6667	0.0834	8.53333	0.2	13	12	28.4
Two	Embu	KVU	Consortiun	52	14	29	0.122867	16.3333	1.43333	93.1667	7.9	40.0667
Two	Embu	KVU	Control	14	19	18.3333	0.0518667	6	1.06667	69.3333	10.9	42.1
Two	Embu	K80	Native	38.3	21	24.6667	0.109567	15.7667	0.833333	54.1667	6.2	40.9667
Two	Embu	K80	Biofix	35.7	16	17.3333	0.0266333	4.16667	2.33333	151.667	10.4	32.2
Two	Embu	K80	Consortiun	45	23	20.3333	0.0645333	7.2	1.6	104	10	62.7
Two	Embu	K80	Control	45.7	21	9	0.0369333	2.56667	0.366667	23.8333	6.3	38.7333
Two	Embu	M66	Native	52.3	21	15	0.0654667	9.5	0	0	0	31
Two	Embu	M66	Biofix	47.7	16	22.3333	0.0788	6.3	0.5	32.5	10.7	33.3
Two	Embu	M66	Consortiun	31.7	10	5.66667	0.0297	4.33333	0.7	45.5	13.1	29.1667
Two	Embu	M66	Control	47.7	21	15	0.0448667	4.7	0.333333	21.6667	10.5	29.8333
Two	Embu	KVU	Native	47.7	20	28.3333	0.131933	8.3	3.26667	212.333	9.4	80.7667
Two	Embu	KVU	Biofix	56.7	27	17.6667	0.109467	7.23333	0.333333	21.6667	8.3	45.7667
Two	Embu	KVU	Consortiun	45.7	15	10.3333	0.0763	12.2667	1.4	91	9.3	42.7
Two	Embu	KVU	Control	45.7	19	6.66667	0.0374	6.7	1.6	104	10	58.9667
Two	Embu	K80	Native	60.3	31	22	0.117633	15.1333	0	0	0	81.3333
Two	Embu	K80	Biofix	57.3	31	27	0.0847333	15.2667	1.8	117	12	57.1333
Two	Embu	K80	Consortiun	55.7	23	18	0.107833	13	1.5	97.5	4.3	84.6333
Two	Embu	K80	Control	53.7	27	8.66667	0.0211667	10.5	0	0	0	32.6333
Two	Embu	M66	Native	46.3	27	18	0.142633	11.8333	0.2	13	8.6	50.6
Two	Embu	M66	Biofix	52.3	24	9.33333	0.0461333	11.1	0	0	0	41.8
Two	Embu	M66	Consortiun	50.3	13	12.6667	0.0494667	5.93333	8.46667	550.333	10.7	60.1
Two	Embu	M66	Control	48.3	20	8.66667	0.0254667	5.66667	0.433333	28.1667	10.8	44.3
Two	Embu	KVU	Native	33	8	42	0.130367	13.5	6.33333	411.667	10.2	69.5667
Two	Embu	KVU	Biofix	54.7	25	6.33333	0.0178667	13	0.133333	8.66667	8	46.6667
Two	Embu	KVU	Consortiun	62.3	31	22	0.107133	14.9333	0.666667	43.3333	11.1	75.3
Two	Embu	KVU	Control	55.7	23	46.3333	0.0629667	11.5333	0	0	0	48.8333
Two	Embu	K80	Native	60	26	27.6667	0.0625333	11.2333	17.4	1131	13.1	73.8
Two	Embu	K80	Biofix	56.7	24	5.33333	0.00886667	6.13333	0.9	58.5	6.9	46.8
Two	Embu	K80	Consortiun	59	30	19	0.0837333	13.4	1.26667	82.3333	15	44.2
Two	Embu	K80	Control	45.3	18	27.6667	0.0328	7.26667	1.93333	125.667	8.6	42.3
Two	Embu	M66	Native	55.3	28	20	0.0540333	10.6	2.1	136.5	11.6	39.3333
Two	Embu	M66	Biofix	57.7	21	18.6667	0.0283	10.5667	5.46667	355.333	13.8	30.2
Two	Embu	M66	Consortiun	59	23	20.3333	0.0538667	9	3	195	12.7	43.2333
Two	Embu	M66	Control	45	13	14	0.0348333	8.3	0.766667	49.8333	11.8	45.2
Two	Embu	KVU	Native	48	13	22	0.0913	16.2333	5.4	351	13.9	30.9667
Two	Embu	KVU	Biofix	50.3	19	25	0.0914667	7.26667	12.6	819	17.3	49.6
Two	Embu	KVU	Consortiun	76.7	24	31	0.0703667	11.0333	9.23333	600.167	14.3	44.7333
Two	Embu	KVU	Control	61.3	9	13	0.0144	4.86667	4	260	11	20.2
Two	Embu	K80	Native	39.3	20	28	0.0703	11.3	4.1	266.5	9.7	69.4667
Two	Embu	K80	Biofix	50	26	14.6667	0.0623	11.4667	0.466667	30.3333	10	81.3
Two	Embu	K80	Consortiun	65	33	43.6667	0.104067	15.7333	3.06667	199.333	0	78.2333
Two	Embu	K80	Control	67	39	16	0.0647	6.8	0	0	10.5	14.0333
Two	Embu	M66	Native	79.7	24	21.3333	0.0650333	16.2667	3.83333	249.167	11	54.7333
Two	Embu	M66	Biofix	50	18	24	0.0615667	8.56667	1.7	110.5	9.6	35.5
Two	Embu	M66	Consortiun	74.3	32	22.3333	0.0496333	19.8	16.6333	1081.17	14.9	95.1
Two	Embu	M66	Control	44.7	20	19.6667	0.0394333	8.3	2.83333	184.167	9.7	50.5333
Two	Embu	KVU	Native	54.7	25	23.3333	0.0521333	13.2333	0.433333	28.1667	10	72.3667
Two	Embu	KVU	Biofix	48	24	6.33333	0.0378667	9.8	1.13333	73.6667	10	53.2333
Two	Embu	KVU	Consortiun	59.7	25	51	0.135833	10.8333	1.06667	69.3333	15.9	58.4667
Two	Embu	KVU	Control	57	20	25	0.0436333	5.9	0	0	0	49.7333
Two	Embu	K80	Native	44.3	14	16	0.0592333	7.6	8.43333	548.167	13.1	65.5
Two	Embu	K80	Biofix	48.3	24	45.3333	0.131767	15.6333	6.73333	437.667	10.8	45.1333
Two	Embu	K80	Consortiun	53.3	14	30.6667	0.0472333	17.7	5.6	364	8.5	54.4333
Two	Embu	K80	Control	44.7	21	16.3333	0.0240667	5.7	0.733333	47.6667	13.4	51.8333
Two	Embu	M66	Native	71	13	37.3333	0.1898	21.0333	1.6	104	16.8	64.2
Two	Embu	M66	Biofix	34.3	7	14	0.0446667	12.4	5.96667	387.833	14.9	35.1333
Two	Embu	M66	Consortiun	72	31	57.6667	0.197167	7.06667	4.1	266.5	9.7	46.8333
Two	Embu	M66	Control	62.3	26	18	0.0259	4.33333	1.56667	101.833	9.4	46.5667
Two	Embu	KVU	Native	63.3	26	35.6667	0.0717	16.5	3.2	208	12.8	29.0333
Two	Embu	KVU	Biofix	46.3	23	36	0.0753667	11.1	0.766667	49.8333	11.6	77.9
Two	Embu	KVU	Consortiun	39.7	18	17.6667	0.0620333	24.5333	3.36667	218.833	13.9	35.7
Two	Embu	KVU	Control	47	19	22	0.0645667	11.9333	3.93333	255.667	9.4	18.7333
Two	Kitui	K80	Native	49.7	9	17.3333	0.0720667	5.6	0	0	0	0
Two	Kitui	K80	Biofix	43.3	7	13	0.0371	2.53333	0	0	0	0
Two	Kitui	K80	Consortiun	39.6667	5	7.33333	0.0145333	3.96667	0	0	0	0
Two	Kitui	K80	Control	52.3	9	15.6667	0.0366333	1.8	0	0	0	0
Two	Kitui	M66	Native	52	7	11	0.036	3.56667	0	0	0	0
Two	Kitui	M66	Biofix	33	4	9	0.0316667	1.5	0	0	0	0
Two	Kitui	M66	Consortiun	43	4	2.66667	0.00936667	3.1	0	0	0	0
Two	Kitui	M66	Control	38	4	4.33333	0.0128667	1.36667	0	0	0	0
Two	Kitui	KVU	Native	44.7	7	1.66667	0.0267	3.66667	0	0	0	0
Two	Kitui	KVU	Biofix	57	7	15.3333	0.0480333	3.8	0	0	0	0
Two	Kitui	KVU	Consortiun	55	8	12.3333	0.00696667	3.93333	0	0	0	0
Two	Kitui	KVU	Control	43	5	6.66667	0.0160667	1.63333	0	0	0	0
Two	Kitui	K80	Native	50.7	5	7	0.00553333	2.36667	0	0	0	0
Two	Kitui	K80	Biofix	48.7	6	4.66667	0.0141	1.26667	0	0	0	0
Two	Kitui	K80	Consortiun	30	4	2	0.00343333	0.8	0	0	0	0
Two	Kitui	K80	Control	53.7	16	8	0.00916667	0.8	0	0	0	0
Two	Kitui	M66	Native	41.7	5	1.33333	0.0134667	1.83333	0	0	0	0
Two	Kitui	M66	Biofix	56.7	6	18.3333	0.0870667	3.6	0	0	0	0
Two	Kitui	M66	Consortiun	59	10	8	0.0598333	3.6	0	0	0	0
Two	Kitui	M66	Control	42	4	6.33333	0.0174	0.4	0	0	0	0
Two	Kitui	KVU	Native	49	9	8.66667	0.0492333	3.73333	0	0	0	0
Two	Kitui	KVU	Biofix	50.7	6	14.3333	0.0920667	1	0	0	0	0
Two	Kitui	KVU	Consortiun	45.3	5	11	0.0460667	2.4	0	0	0	0
Two	Kitui	KVU	Control	60.7	7	10.6667	0.0262333	0.8	0	0	0	0
Two	Kitui	K80	Native	37.7	7	9	0.0247667	2.46667	0	0	0	0
Two	Kitui	K80	Biofix	41.7	6	11.3333	0.0332667	1.3	0	0	0	0
Two	Kitui	K80	Consortiun	52.7	8	5	0.0122333	1.96667	0	0	0	0
Two	Kitui	K80	Control	29.7	3	7	0.0138	0.6	0	0	0	0
Two	Kitui	M66	Native	54	5	7.33333	0.0219667	2.43333	0	0	0	0
Two	Kitui	M66	Biofix	41.7	6	8	0.0465333	2.2	0	0	0	0
Two	Kitui	M66	Consortiun	38.3	8	5	0.0224333	4.33333	0	0	0	0
Two	Kitui	M66	Control	39.3	4	4.33333	0.0172667	1.1	0	0	0	0
Two	Kitui	KVU	Native	41.7	4	8.33333	0.0495	4	0	0	0	0
Two	Kitui	KVU	Biofix	38	4	5.66667	0.0307667	6	0	0	0	0
Two	Kitui	KVU	Consortiun	47	7	9	0.0483	3.8	0	0	0	0
Two	Kitui	KVU	Control	58.3	10	0.666667	0.000266667	0.8	0	0	0	0
Two	Kitui	K80	Native	39.3	5	11	0.0257667	1.93333	0	0	0	0
Two	Kitui	K80	Biofix	35.7	4	7	0.0144333	1.86667	0	0	0	0
Two	Kitui	K80	Consortiun	29.3	4	10.6667	0.0224333	0.766667	0	0	0	0
Two	Kitui	K80	Control	38.3	6	10	0.0122333	0.7	0	0	0	0
Two	Kitui	M66	Native	36	3	7.66667	0.0303	1.33333	0	0	0	0
Two	Kitui	M66	Biofix	25.7	4	1.66667	0.00586667	0.666667	0	0	0	0
Two	Kitui	M66	Consortiun	35	3	6.33333	0.00693333	1.03333	0	0	0	0
Two	Kitui	M66	Control	45	4	4	0.0127	0.6	0	0	0	0
Two	Kitui	KVU	Native	37.7	3	7	0.0143667	1.83333	0	0	0	0
Two	Kitui	KVU	Biofix	47	7	7.66667	0.0207333	3.56667	0	0	0	0
Two	Kitui	KVU	Consortiun	56.7	4	2.33333	0.0038	1	0	0	0	0
Two	Kitui	KVU	Control	36.7	4	3.66667	0.0353333	0.4	0	0	0	0
Two	Kitui	K80	Native	47	6	4	0.0532	2.2	0	0	0	0
Two	Kitui	K80	Biofix	40.7	6	10.3333	0.0561	2.83333	0	0	0	0
Two	Kitui	K80	Consortiun	39.3	4	6	0.0290667	1.26667	0	0	0	0
Two	Kitui	K80	Control	39	6	4	0.0312667	0.9	0	0	0	0
Two	Kitui	M66	Native	41.7	5	13	0.0349	2.7	0	0	0	0
Two	Kitui	M66	Biofix	42.3	5	5.33333	0.0235333	2.56667	0	0	0	0
Two	Kitui	M66	Consortiun	44	6	11	0.0738	4.03333	0	0	0	0
Two	Kitui	M66	Control	34.7	5	9.66667	0.0221333	0.7	0	0	0	0
Two	Kitui	KVU	Native	52	6	15	0.0527667	3.6	0	0	0	0
Two	Kitui	KVU	Biofix	40	6	3.33333	0.0448667	2.3	0	0	0	0
Two	Kitui	KVU	Consortiun	41.7	4	9.66667	0.0207333	1.56667	0	0	0	0
Two	Kitui	KVU	Control	41	5	8	0.0309	0.4	0	0	0	0
Two	Kitui	K80	Native	32.7	4	7.33333	0.0221333	1.3	0	0	0	0
Two	Kitui	K80	Biofix	32.3	3	8.66667	0.0139667	0.6	0	0	0	0
Two	Kitui	K80	Consortiun	44.3	5	12.3333	0.0346	1.23333	0	0	0	0
Two	Kitui	K80	Control	35.3	4	6.33333	0.0178333	0.5	0	0	0	0
Two	Kitui	M66	Native	37.3	4	6	0.0149	1.5	0	0	0	0
Two	Kitui	M66	Biofix	28.3	2	6.33333	0.0149	0.5	0	0	0	0
Two	Kitui	M66	Consortiun	34.7	4	6.33333	0.0200333	2.4	0	0	0	0
Two	Kitui	M66	Control	43.7	4	12.3333	0.0095	0.5	0	0	0	0
Two	Kitui	KVU	Native	35.7	4	9	0.0342333	1.7	0	0	0	0
Two	Kitui	KVU	Biofix	43	4	10.3333	0.0339	1.16667	0	0	0	0
Two	Kitui	KVU	Consortiun	41.3	4	5	0.0101667	0.166667	0	0	0	0
Two	Kitui	KVU	Control	47	6	6	0.0160333	0.7	0	0	0	0
Two	Kitui	K80	Native	40.7	8	7	0.0182	5.6	0	0	0	0
Two	Kitui	K80	Biofix	52	15	10.6667	0.0696333	6.83333	0	0	0	0
Two	Kitui	K80	Consortiun	41.7	15	11	0.101767	6.33333	0	0	0	0
Two	Kitui	K80	Control	46	13	3.66667	0.0109	1.9	0	0	0	0
Two	Kitui	M66	Native	43.3	5	1.66667	0.0275	2.56667	0	0	0	0
Two	Kitui	M66	Biofix	34.7	7	4.66667	0.0139	2.96667	0	0	0	0
Two	Kitui	M66	Consortiun	45.3	10	4	0.0209333	4	0	0	0	0
Two	Kitui	M66	Control	54.7	18	3.66667	0.0196	0.9	0	0	0	0
Two	Kitui	KVU	Native	50	7	10.6667	0.0436333	2.76667	0	0	0	0
Two	Kitui	KVU	Biofix	37.7	10	7.33333	0.0247	3.03333	0	0	0	0
Two	Kitui	KVU	Consortiun	39.3	8	9	0.0365333	3.06667	0	0	0	0
Two	Kitui	KVU	Control	41	6	1.33333	0.00413333	0.9	0	0	0	0
Two	Kitui	K80	Native	55.3	20	19	0.126533	7.73333	0	0	0	0
Two	Kitui	K80	Biofix	48.7	18	14.6667	0.0861	9	0	0	0	0
Two	Kitui	K80	Consortiun	43.3	20	9.66667	0.056	7.96667	0	0	0	0
Two	Kitui	K80	Control	50.3	18	23.3333	0.1148	2.53333	0	0	0	0
Two	Kitui	M66	Native	44.3	6	7.33333	0.0247	3.03333	0	0	0	0
Two	Kitui	M66	Biofix	38.3	5	3.66667	0.0141	2.43333	0	0	0	0
Two	Kitui	M66	Consortiun	42.7	8	7	0.0345	4.63333	0	0	0	0
Two	Kitui	M66	Control	52.7	13	14	0.0129667	1.2	0	0	0	0
Two	Kitui	KVU	Native	55.3	18	18.6667	0.0791333	7.66667	0	0	0	0
Two	Kitui	KVU	Biofix	57.3	17	7	0.0351667	9.03333	0	0	0	0
Two	Kitui	KVU	Consortiun	48	11	16.6667	0.140033	4.9	0	0	0	0
Two	Kitui	KVU	Control	47.7	14	6	0.0409	2.5	0	0	0	0
Two	Kitui	K80	Native	40.3	11	7.33333	0.0658333	6.63333	0	0	0	0
Two	Kitui	K80	Biofix	45.3	16	12.3333	0.0996333	7.1	0	0	0	0
Two	Kitui	K80	Consortiun	41.3	18	22.6667	0.108667	7.1	0	0	0	0
Two	Kitui	K80	Control	36	6	9.33333	0.0205667	2.23333	0	0	0	0
Two	Kitui	M66	Native	35	6	11	0.0496333	4.53333	0	0	0	0
Two	Kitui	M66	Biofix	33	5	9.66667	0.0338	1.63333	0	0	0	0
Two	Kitui	M66	Consortiun	40.7	11	13.3333	0.0686667	6.5	0	0	0	0
Two	Kitui	M66	Control	53	9	6	0.0215667	1.4	0	0	0	0
Two	Kitui	KVU	Native	41.7	10	14	0.0968267	2.96667	0	0	0	0
Two	Kitui	KVU	Biofix	46.7	14	9.66667	0.0547333	5.93333	0	0	0	0
Two	Kitui	KVU	Consortiun	45	8	19.3333	0.0883	5.73333	0	0	0	0
Two	Kitui	KVU	Control	45.7	11	18.6667	0.0718667	1.5	0	0	0	0
Two	Kitui	K80	Native	30.7	4	20.3333	0.0242	0.766667	0.466667	30.3333	6.7	0.866667
Two	Kitui	K80	Biofix	34	5	16.3333	0.0182333	1.26667	0.666667	43.3333	8	1
Two	Kitui	K80	Consortiun	29.7	4	15	0.0185333	0.633333	0.3	19.5	4.9	0.566667
Two	Kitui	K80	Control	29.5	4	20	0.0996667	0.6	0	0	0	0
Two	Kitui	M66	Native	37.7	5	19	0.0375	1	0.766667	49.8333	7.4	1.2
Two	Kitui	M66	Biofix	33	4	12	0.0195333	0.966667	0.1	6.5	3	1.13333
Two	Kitui	M66	Consortiun	29.7	4	15.6667	0.0287667	1.03333	0.233333	15.1667	3.2	1
Two	Kitui	M66	Control	32.3	3	13	0.0119667	0.666667	0.6	39	7.8	0.933333
Two	Kitui	KVU	Native	36.7	4	10.3333	0.0162667	1.06667	0.966667	62.8333	10	1.36667
Two	Kitui	KVU	Biofix	33.3	3	8.33333	0.0108	0.533333	1.5	97.5	8.7	1.53333
Two	Kitui	KVU	Consortiun	26.3	4	14.6667	0.0121667	0.5	0.333333	21.6667	5.3	0.866667
Two	Kitui	KVU	Control	42.3	4.3	19	0.0131667	0.7	0.766667	49.8333	4.7	1.2
Two	Kitui	K80	Native	38.3	4	11.6667	0.0243667	1.03333	0.8	52	5	1.1
Two	Kitui	K80	Biofix	37.3	4	14	0.0469	1.3	0.7	45.5	9.1	1.73333
Two	Kitui	K80	Consortiun	29	4	10.6667	0.0260333	1.46667	0.6	39	7.8	0.933333
Two	Kitui	K80	Control	32.7	4	17.6667	0.0218	0.7	0.233333	15.1667	3.9	0.666667
Two	Kitui	M66	Native	31.3	3	12.3333	0.0665	1.4	1.46667	95.3333	7.8	1.7
Two	Kitui	M66	Biofix	27.8	3	11.6667	0.0126333	0.566667	0.0666667	4.33333	3.3	0.3
Two	Kitui	M66	Consortiun	36	4	14	0.0301	1.06667	1.53333	99.6667	9.6	1.93333
Two	Kitui	M66	Control	43.7	4	11.6667	0.0438333	0.7	0.833333	54.1667	10.8	0.7
Two	Kitui	KVU	Native	37	5	8.33333	0.0216333	0.966667	0.533333	34.6667	5	0.5
Two	Kitui	KVU	Biofix	35.7	4	13.3333	0.0155667	0.8	0.1	6.5	5	0.6
Two	Kitui	KVU	Consortiun	29.7	4	17	0.0181667	0.6	0.533333	34.6667	8	0.866667
Two	Kitui	KVU	Control	33.7	4	15.3333	0.0151	0.6	0.433333	28.1667	8.8	0.533333
Two	Kitui	K80	Native	37	3	12	0.0204667	1.13333	0.3	19.5	5	0.7
Two	Kitui	K80	Biofix	39.7	5	11.6667	0.0145667	0.6	0.3	19.5	7.5	0.333333
Two	Kitui	K80	Consortiun	34	4	14.3333	0.0145667	0.933333	0.766667	49.8333	8.2	0.8
Two	Kitui	K80	Control	44	6	17.6667	0.0185667	0.6	0	0	0	0
Two	Kitui	M66	Native	34.7	2	5.66667	0.0210667	0.566667	0.733333	47.6667	6.5	3.66667
Two	Kitui	M66	Biofix	40	3	9	0.0164667	1.2	0.2	13	7.5	0.7
Two	Kitui	M66	Consortiun	43	5	9	0.0381	2.26667	0.233333	15.1667	4.1	0.466667
Two	Kitui	M66	Control	34.7	4	13.6667	0.0225667	0.6	0.7	45.5	8.1	0.8
Two	Kitui	KVU	Native	33.3	3	10	0.0115667	1.63333	1.13333	73.6667	5.7	0.7
Two	Kitui	KVU	Biofix	31.7	4	14.6667	0.0323	1.53333	4.33333	281.667	11.5	0.933333
Two	Kitui	KVU	Consortiun	38.7	4	10.6667	0.0217667	1.2	0.166667	10.8333	2.4	1
Two	Kitui	KVU	Control	48.3	6	12.6667	0.0167667	0.733333	0.466667	30.3333	7.7	0.366667
Two	Kitui	K80	Native	0	0	0	0	0	0.466667	30.3333	5.8	0.8
Two	Kitui	K80	Biofix	27	3	14.6667	0.0146667	0.6	0.5	32.5	6.3	0.7
Two	Kitui	K80	Consortiun	29	4	13	0.0154333	0.966667	0	0	0	0
Two	Kitui	K80	Control	25.7	4	10.3333	0.0143333	0.833333	0	0	0	0
Two	Kitui	M66	Native	26.7	3	8.33333	0.0136	0.8	0.933333	60.6667	5.6	0.6
Two	Kitui	M66	Biofix	23.8	2	8.66667	0.0184	0.6	0.333333	21.6667	5	0.6
Two	Kitui	M66	Consortiun	27	3	9.33333	0.0114333	0.7	0.933333	60.6667	8.2	0.9
Two	Kitui	M66	Control	30.7	4	12.3333	0.0154	0.6	0.8	52	6	0.6
Two	Kitui	KVU	Native	24.8	3	9.66667	0.0169	0.633333	0.633333	41.1667	9	0.866667
Two	Kitui	KVU	Biofix	26	4	13	0.0186333	0.833333	0.366667	23.8333	8.7	0.533333
Two	Kitui	KVU	Consortiun	23.7	3	4.66667	0.0031	0.433333	0.933333	60.6667	9.3	1.1
Two	Kitui	KVU	Control	26.7	3	7.66667	0.0084	0.4	0.0666667	4.33333	4	0.2
Two	Kitui	K80	Native	30.3	5	11	0.0215333	0.833333	1.73333	112.667	7.1	0.966667
Two	Kitui	K80	Biofix	33.7	5	14.3333	0.0352	1.2	2.33333	151.667	10.6	1.6
Two	Kitui	K80	Consortiun	29	4	6.33333	0.00606667	0.7	0.8	52	7.1	1.16667
Two	Kitui	K80	Control	27	5	9	0.0140667	0.533333	0.866667	56.3333	8.4	0.966667
Two	Kitui	M66	Native	25.7	3	17.3333	0.0266333	1.4	1.2	78	5	0.566667
Two	Kitui	M66	Biofix	33.7	4	11.3333	0.0311667	1	0.633333	41.1667	7.3	0.766667
Two	Kitui	M66	Consortiun	30	4	11	0.0187	1.33333	1	65	7	0.833333
Two	Kitui	M66	Control	34.7	4	6.66667	0.0181667	0.7	0.233333	15.1667	9.7	0.5
Two	Kitui	KVU	Native	25.3	3	7.66667	0.0119333	0.6	0.766667	49.8333	6.1	0.7
Two	Kitui	KVU	Biofix	31.7	3	6	0.00713333	0.7	0.333333	21.6667	7.1	0.566667
Two	Kitui	KVU	Consortiun	35	5	11.3333	0.0305	1.26667	1.46667	95.3333	8.5	1.56667
Two	Kitui	KVU	Control	32.7	4	6.66667	0.0109667	0.6	0.766667	49.8333	8.8	0.7345
Two	Kitui	K80	Native	31.3	4	13.3333	0.0348667	0.933333	0.8	52	12.5	1.3
Two	Kitui	K80	Biofix	29.3	3	16.6667	0.0258333	0.733333	0.266667	17.3333	6.7	0.466667
Two	Kitui	K80	Consortiun	30.7	4	12	0.0350333	1.43333	0.3	19.5	6.9	0.533333
Two	Kitui	K80	Control	31.3	3	5	0.0054	0.1	0.3	19.5	14.1	0.533333
Two	Kitui	M66	Native	36.3	5	14.6667	0.0201667	1.33333	0.433333	28.1667	8.1	0.7
Two	Kitui	M66	Biofix	27.7	3	5	0.0065	0.566667	0	0	0	0
Two	Kitui	M66	Consortiun	26.7	3	8.33333	0.00663333	0.566667	1.1	71.5	8.3	1.76667
Two	Kitui	M66	Control	28.7	3	3.33333	0.0102667	0.4	0	0	0	0
Two	Kitui	KVU	Native	31.7	3	4.33333	0.0067	1.03333	0.666667	43.3333	7.7	0.833333
Two	Kitui	KVU	Biofix	32.7	4	14.6667	0.0217	0.633333	0.433333	28.1667	6.2	0.7
Two	Kitui	KVU	Consortiun	36	4	12	0.0239333	1.1	0.666667	43.3333	5.8	0.633333
Two	Kitui	KVU	Control	31.7	4	8.66667	0.0154	0.6	0.9	58.5	8.6	0.833333

## Sheet: physicochemical characteristics
Farms	Soils characteristics (physicochemical properties)
	PH	TN(%)	TOC(%)	P(ppm)	K(%)	Ca(%)	Mg(%)	Mn(%)	Cu(ppm)	Fe(ppm)	Zn(ppm)	Na(%)	EC	Sandy(%)	Clay(%)	Silt(%)	TtS
Embu farm1	5.81	0.16	1.75	50	1.62	2.6	3.1	0.67	1.01	29.2	10.4	0.5	0	46	42	12	SC
Embu farm2	5.84	0.17	1.77	3	1	2.6	2.41	0.5	0.39	10.8	6.96	0.68	0	48	46	6	SC
Embu farm3	5.5	0.15	1.73	30	1.12	2	2.05	0.65	1.4	14.8	6.75	0.54	0	60	26	14	SCL
Embu farm4	6.06	0.18	2.2	25	1.54	3.6	3.03	0.56	0.39	16.4	7.66	1.22	0	50	42	8	SC
Embu farm5	5.38	0.14	1.33	25	1.16	2	2.02	1.09	1.21	21.4	9.66	0.48	0	50	44	6	SC
Tharaka farm 1	7.01	0.13	1.18	23	0.42	16.6	5.38	0.39	1.98	52.3	1.28	0.58	0.25	72	18	10	SL
Tharaka farm 2	7.12	0.12	1	15	0.3	13.2	5.82	0.45	2.15	1.07	1.03	0.54	0.19	70	18	12	SL
Tharaka farm3	6.9	0.13	1.22	20	0.54	11.2	3.86	0.89	2.32	66.2	2.08	0.6	0	76	12	12	SL
Tharaka farm4	7.1	0.18	2.07	16	0.7	17	4.86	0.64	2.58	16	0.31	0.52	0.25	76	14	10	SL
Tharaka farm5	5.68	0.13	1.37	20	0.62	1	2.84	0.5	4.04	23.9	0.26	0.52	0	44	48	8	C
Kitui farm1	6.66	0.07	0.67	100	0.95	4	2.6	0.5	4.9	23.5	4	0	0	68	28	4	SCL
Kitui farm2	6.44	0.11	1.04	60	0.88	4.4	2.09	0.32	5.64	13.6	9.85	0.64	0	64	30	6	SCL
Kitui farm3	5.74	0.11	0.97	20	0.88	1.4	2.05	0.34	6.421	14.2	4.82	0.62	0	62	34	4	SCL
Kitui farm4	6.74	0.11	1	70	0.48	5	1.4	0.3	4.6	2.11	8.04	0.58	0	82	16	2	SL
Kitui farm5	6.22	0.05	0.42	45	1.02	3	1.84	0.55	3	62.3	5.16	0.64	0	72	24	4	SCL

## Sheet: symbiotic efficiency data
Isolate	Nodule Number	Nodule Dry Weight	Shoot Dry Weight	Root Dry Weight	Symbiotic Efficiency
Seventeen	39	0.0288	0.7452	0.2661	72.3618
Seventeen	33	0.0423	0.7608	0.2653	73.8766
Seventeen	22	0.0407	0.7764	0.3095	75.3915
Seventeen	30	0.0392	0.8585	0.2066	83.3637
Twenty	31	0.0571	0.7791	0.4533	75.6536
Twenty	35	0.0619	0.8812	0.4676	85.5679
Twenty	26	0.0542	0.5031	0.3834	48.853
Twenty	20	0.0522	0.7401	0.4311	71.8666
ninteen	33	0.0684	0.8985	0.3468	87.2478
ninteen	24	0.0764	0.9474	0.4273	91.9962
ninteen	28	0.0881	1.1023	0.3247	107.038
ninteen	20	0.07	0.9457	0.4883	91.8311
Commercial	24	0.06	1.0114	0.5068	98.2109
Commercial	34	0.0695	0.8152	0.2914	79.1591
Commercial	39	0.0698	0.8181	0.3609	79.4407
Commercial	39	0.4786	0.9893	0.1134	96.0649
Positive	0	0	1.2156	0.3553	118.039
Positive	0	0	0.8067	0.2891	78.3337
Positive	0	0	0.9754	0.3817	94.7151
Positive	0	0	1.1216	0.2964	108.912
Negative	0	0	0.2708	0.0426	26.2957
Negative	0	0	0.1189	0.078	11.5457
Negative	0	0	0.2337	0.1701	22.6932
Negative	0	0	0.1601	0.0887	15.5463
One	20	0.0397	0.7874	0.2943	76.4596
One	30	0.0278	0.7024	0.5942	68.2058
One	24	0.0238	0.7777	0.2307	75.5177
One	39	0.0405	1.0906	0.5229	105.901
Two	31	0.0829	0.988	0.5342	95.9386
Two	3	0.0379	1.0894	0.3686	105.785
Two	0	0	1.1821	0.2664	114.786
Two	49	0.101	0.9446	0.4953	91.7243
Three	51	0.1081	0.7767	0.2893	75.4206
Three	36	0.0905	0.9199	0.3122	89.3259
Three	31	0.1017	0.8944	0.5233	86.8497
Three	40	0.127	0.8006	0.1832	77.7414
Six	9	0.0038	0.2808	0.1803	27.2668
Six	4	0	0.476	0.0878	46.2214
Six	24	0.0047	0.5435	0.2714	52.776
Six	0	0	0.3316	0.2362	32.1996
Seven	48	0.1094	1.4124	0.8836	137.15
Seven	0	0	0.7942	0.2804	77.1199
Seven	20	0.0842	1.2608	0.463	122.429
Seven	32	0.0864	1.3444	0.5016	130.546
Ten	16	0.015	0.2929	0.3275	28.4417
Ten	42	0.0217	0.596	0.3715	57.8739
Ten	7	0.0088	0.6701	0.3156	65.0693
Ten	10	0.0146	0.5604	0.2811	54.417
Twelve	37	0.0869	0.5454	0.2417	52.9605
Twelve	17	0.0708	0.4837	0.1834	46.9691
Twelve	25	0.0772	0.3583	0.0987	34.7923
Twelve	38	0.0809	0.4222	0.223	40.9973
Thirteen	33	0.1066	0.4782	0.682	46.4351
Thirteen	45	0.1162	0.6941	0.6954	67.3998
Thirteen	50	0.1519	0.4153	0.4621	40.3272
Thirteen	72	0.1588	0.6774	0.663	65.7782
Fourteen	0	0	0.8772	0.3951	85.1795
Fourteen	20	0.0854	1.1849	0.3046	115.058
Fourteen	48	0.0946	1.0206	0.4187	99.1042
Fourteen	0	0	0.7348	0.3085	71.3519
Fifteen	2	0.0062	0.5647	0.2811	54.8346
Fifteen	0	0	0.8926	0.3712	86.6749
Fifteen	1	0.0046	0.5382	0.2788	52.2613
Fifteen	0	0	0.6787	0.2347	65.9044
Sixteen	33	0.0087	0.9474	0.6542	91.9962
Sixteen	29	0.0089	1.023	0.3491	99.3373
Sixteen	17	0.0051	0.8923	0.3017	86.6458
Sixteen	12	0.0043	0.7006	0.4511	68.031

## Sheet: weather data
	Kitui		Oct	Nov	Dec	Jan	Feb	Mar	Apr	May	Jun
		Mean Rain (mm)	91.8	146.1	225.1	122.9	101.7	188.8	350.2	66.2	14.1
		Mean Max (°C)	23	23	22	23	24	25	23	22	22
		Mean Min (°C)	17	16	16	16	16	17	16	15	14
	Embu		Oct	Nov	Dec	Jan	Feb	Mar	Apr	May	Jun
		Mean Rain (mm)	383.1	341	271.2	187	99	295.9	414	285.5	145.4
		Mean Max (°C)	24	23	23	25	26	26	24	23	23
		Mean Min (°C)	16	16	15	15	16	16	16	16	15
	Tharaka Nithi		Oct	Nov	Dec	Jan	Feb	Mar	Apr	May	Jun
		Mean Rain (mm)	250.4	430	410.5	234.8	200	328.7	398.1	139.1	73.4
		Mean Max (°C)	24	22	23	23	25	25	24	23	23
		Mean Min (°C)	15	15	14	15	16	16	15	15	14
